# Supplementary material for: A domino pericyclic route to polysubstituted salicylic acid derivatives: four sequential processes from enynones and ketene silyl acetals
Source: Royal Society of Chemistry journal article supplement (doi:10.1039/c1cc11758k), 2011-01-01

## Supporting Information

### A Domino Pericyclic Route to Polysubstituted Salicylic Acid Derivatives: Four Sequential Processes from Enynones and Ketene Silyl Acetals

Toshiyuki Hamura,<sup>‡</sup> Shin Iwata, and Keisuke Suzuki<sup>\*</sup>

Department of Chemistry, Tokyo Institute of Technology, and SORST–JST, O-okayama,  
Meguro-ku, Tokyo 152-8551, Japan

<sup>‡</sup>Department of Chemistry, School of Science and Technology, Kwansai Gakuin University, and  
PRESTO, Japan Science and Technology Agency (JST)  
2-1 Gakuen, Sanda, Hyogo 669-1337, Japan

[ksuzuki@chem.titech.ac.jp](mailto:ksuzuki@chem.titech.ac.jp)

#### General Experimental Procedures

All experiments dealing with air- and moisture-sensitive compounds were conducted under an atmosphere of dry argon.

For thin-layer chromatography (TLC) analysis, Merck pre-coated plates (silica gel 60 F<sub>254</sub>, Art 5715, 0.25 mm) were used. For flash column chromatography, silica gel 60 (Merck Art 7734, 70–230 mesh) was used. Silica gel preparative TLC (PTLC) was performed on Merck silica gel 60 PF<sub>254</sub> (Art 7747).

Melting point (mp) determinations were performed by using a Yanako MP-S3 instrument and are uncorrected. <sup>1</sup>H NMR and <sup>13</sup>C NMR were measured on a JEOL JNM lambda-400, a JEOL JNM ECA-300, a JEOL JNM ECA-400, and a Bruker DRX-500 spectrometer. Infrared (IR) spectra were recorded on a Jasco IR-Report-100, and a Horiba FT-710 spectrometer. Attenuated Total Reflectance Fourier Transformation Infrared (ATR-FTIR) spectra were recorded on a Perkin Elmer 1600 FTIR. Elementary analyses were performed by using Perkin Elmer series II 2004.

### Preparation of dienone **22**:

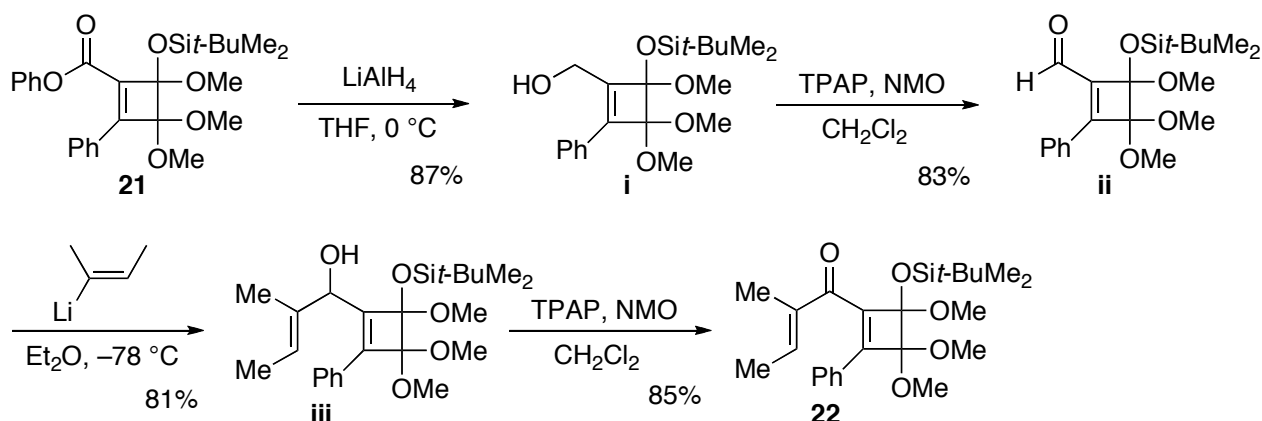

### Synthesis of cyclobutene **i**:

To a solution of cyclobutene **21**<sup>1)</sup> (150 mg, 0.319 mmol) in THF (5.0 mL) was added LiAlH<sub>4</sub> (20 mg, 0.53 mmol) at 0 °C. After 15 min, the reaction was quenched by adding sat. aq. NaHCO<sub>3</sub>. The products were extracted with EtOAc (×3), and the combined organic extracts were washed with brine, dried (Na<sub>2</sub>SO<sub>4</sub>), and concentrated in vacuo. The residue was purified by PTLC (hexane/EtOAc = 7/3) to give cyclobutene **i** (106 mg, 87.4%) as a colorless oil.

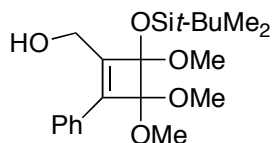

### cyclobutene **i**

<sup>1</sup>H NMR (acetone-*d*<sub>6</sub>, δ)

0.17 (s, 6H), 0.92 (s, 9H), 3.35 (s, 3H), 3.47 (s, 6H), 4.05–4.08 (m, 1H), 4.37–4.78 (m, 2H), 7.28–7.40 (m, 3H), 7.72–7.78 (m, 2H);

<sup>13</sup>C NMR (acetone-*d*<sub>6</sub>, δ)

–2.90, –2.89, 19.0, 26.3, 52.2, 52.7, 55.7, 107.4, 109.8, 128.9, 129.0, 129.4, 133.9, 145.8, 148.4;

IR (neat)

3448, 3056, 2937, 2856, 2834, 1656, 1573, 1494, 1463, 1274, 1253, 1211, 1178, 1139, 1085, 1002, 993, 921, 892, 869, 836, 779 cm<sup>-1</sup>;

Anal. Calcd for C<sub>20</sub>H<sub>32</sub>O<sub>5</sub>Si: C, 63.12; H, 8.48. Found: C, 62.90; H, 8.70.

### Synthesis of aldehyde **ii**:

To a stirred mixture of allyl alcohol **i** (24.4 mg, 0.0641 mmol), NMO (18.0 mg, 0.154 mmol), and 4 Å molecular sieves (60 mg) in CH<sub>2</sub>Cl<sub>2</sub> (2.0 mL) was added TPAP (3.8 mg, 0.011 mmol) at room temperature. After stirred for 12 h, the reaction mixture was filtered through celite pad. The filtrate was purified by PTLC (hexane/EtOAc = 7/3) to afford **ii** (20.2 mg, 83.2%) as a colorless oil.

1) Iwata, S.; Hamura, T.; Matsumoto, T. Suzuki, K. *Chem. Commun.* **2010**, 22, 2211–2221.

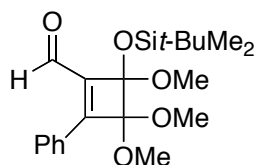

aldehyde **ii**

$^1\text{H NMR}$  (acetone- $d_6$ ,  $\delta$ )

0.14 (s, 3H), 0.18 (s, 3H), 0.93 (s, 9H), 3.40 (s, 3H), 3.42 (s, 3H), 3.48 (s, 3H), 7.47–7.55 (m, 3H), 7.94–7.97 (m, 2H), 10.1 (s, 1H);

$^{13}\text{C NMR}$  (acetone- $d_6$ ,  $\delta$ )

–3.14, –3.10, 19.1, 26.3, 52.3, 52.6, 53.2, 106.4, 109.7, 129.6, 130.3, 132.0, 132.3, 142.7, 159.1, 187.7;

IR (neat)

2943, 2856, 1679, 1572, 1492, 1359, 1261, 1213, 1116, 1060, 1001, 990, 891, 835, 804, 779  $\text{cm}^{-1}$ ;

Anal. Calcd for  $\text{C}_{20}\text{H}_{30}\text{O}_5\text{Si}$ : C, 63.46; H, 7.99. Found: C, 63.22; H, 7.97.

Synthesis of alcohol **iii**:

To a solution of 2-bromo-cis-2-butene (86 mg, 96% purity, 0.61 mmol) in  $\text{Et}_2\text{O}$  (1.2 mL) was slowly added  $t\text{-BuLi}$  (1.48 M in pentane, 0.47 ml, 0.70 mmol) at  $-78^\circ\text{C}$ , and the reaction mixture was further stirred for 1 h; to the stirred solution was added aldehyde **ii** (105 mg, 0.278 mmol) in  $\text{Et}_2\text{O}$  (2.0 mL). After 10 min, the reaction was quenched with water. The products were extracted with  $\text{EtOAc}$  (X3), and the combined organic extracts were washed with brine, dried ( $\text{Na}_2\text{SO}_4$ ), and concentrated in vacuo. The residue was purified by PTLC (hexane/ $\text{EtOAc}$  = 97/3) to give less polar product **iii** (47.6 mg, 39.5%) and more polar product **iii** (49.8 mg, 41.3%).

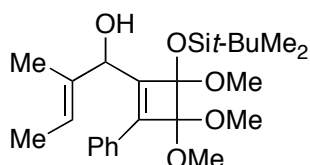

alcohol **iii** (less polar)

$^1\text{H NMR}$  (acetone- $d_6$ ,  $\delta$ )

0.21 (s, 3H), 0.22 (s, 3H), 0.95 (s, 9H), 1.56 (d, 3H,  $J = 6.4$  Hz), 1.63 (s, 3H), 3.30 (s, 3H), 3.41 (s, 3H), 3.46 (s, 3H), 4.03 (d, 1H,  $J = 4.2$  Hz), 5.00 (d, 1H,  $J = 4.2$  Hz), 5.67 (q, 1H,  $J = 6.4$  Hz), 7.25–7.36 (m, 3H), 7.78–7.82 (m, 2H);

$^{13}\text{C NMR}$  (acetone- $d_6$ ,  $\delta$ )

–2.6, –2.5, 13.1, 13.3, 19.2, 26.6, 51.9, 52.6, 52.9, 73.3, 108.0, 109.6, 122.2, 128.6, 128.9, 129.9, 133.9, 137.1, 145.3, 149.9;

IR (neat)

3468, 2936, 1494, 1471, 1387, 1360, 1248, 1210, 1171, 1080, 1029, 992, 894, 835, 805, 778  $\text{cm}^{-1}$ ;

Anal. Calcd for  $\text{C}_{24}\text{H}_{38}\text{O}_5\text{Si}$ : C, 66.32; H, 8.81. Found: C, 66.41; H, 8.80.

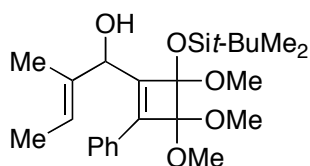

alcohol **iii** (more polar)

$^1\text{H NMR}$  (acetone- $d_6$ ,  $\delta$ )

0.17 (s, 3H), 0.20 (s, 3H), 0.91 (s, 9H), 1.53 (d, 3H,  $J = 6.9$  Hz), 1.58 (s, 3H), 3.32 (s, 3H), 3.42 (s, 3H), 3.54 (s, 3H), 4.18 (d, 1H,  $J = 4.6$  Hz), 4.87 (d, 1H,  $J = 4.6$  Hz), 5.66 (q, 1H,  $J = 6.9$  Hz), 7.24–7.33 (m, 3H), 7.80–7.84 (m, 2H);

$^{13}\text{C}$  NMR (acetone- $d_6$ ,  $\delta$ )

–2.5, 13.1, 13.3, 18.9, 26.5, 51.8, 52.7, 53.2, 73.1, 108.0, 109.7, 122.3, 128.4, 128.9, 130.2, 133.7, 136.7, 146.1, 149.3;

IR (neat)

3479, 2937, 2856, 1493, 1471, 1387, 1360, 1247, 1208, 1172, 1080, 1039, 991, 885, 835, 808, 777  $\text{cm}^{-1}$ ;

Anal. Calcd for  $\text{C}_{24}\text{H}_{38}\text{O}_5\text{Si}$ : C, 66.32; H, 8.81. Found: C, 66.21; H, 8.69.

### Synthesis of dienone **22**:

To a stirred mixture of alcohol **iii** (33.3 mg, 0.0766 mmol), NMO (23.0 mg, 0.196 mmol), and 4 Å molecular sieves (72 mg) in  $\text{CH}_2\text{Cl}_2$  (2.0 mL) was added TPAP (5.2 mg, 0.015 mmol) at room temperature. After stirred for 10 h, the reaction mixture was filtered through celite pad. The filtrate was purified by PTLC (hexane/EtOAc = 7/3) to afford **22** (28.2 mg, 85.1%) as a colorless oil.

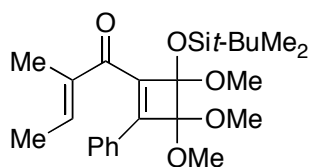

### dienone **22**

$^1\text{H}$  NMR (acetone- $d_6$ ,  $\delta$ )

0.05 (s, 3H), 0.16 (s, 3H), 0.90 (s, 9H), 1.76 (qd, 3H,  $J_1 = 1.0$ ,  $J_2 = 6.9$  Hz), 1.79–1.81 (m, 3H), 3.43 (s, 3H), 3.44 (s, 3H), 3.52 (s, 3H), 6.88 (qq, 1H,  $J_1 = 1.4$ ,  $J_2 = 6.9$  Hz), 7.31–7.47 (m, 5H);

$^{13}\text{C}$  NMR (acetone- $d_6$ ,  $\delta$ )

–3.1, –2.8, 10.3, 15.1, 19.0, 26.5, 52.3, 52.5, 53.7, 108.8, 109.3, 128.9, 129.3, 130.1, 132.8, 139.0, 145.4, 146.4, 148.3, 194.7;

IR (neat)

2937, 2855, 1633, 1493, 1471, 1390, 1360, 1246, 1206, 1171, 1082, 1060, 1028, 994, 887, 835, 805, 779, 752  $\text{cm}^{-1}$ ;

Anal. Calcd for  $\text{C}_{24}\text{H}_{36}\text{O}_5\text{Si}$ : C, 66.63 H, 8.39. Found: C, 66.68; H, 8.45.

### Preparation of dinone **24**:

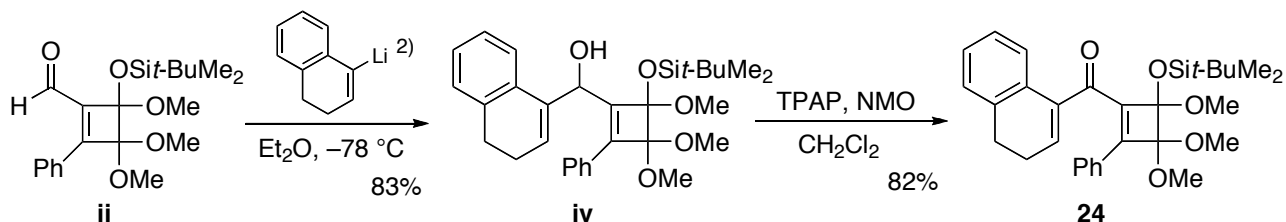

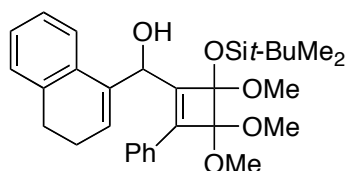

alcohol **iv** (less polar)<sup>2)</sup>

<sup>1</sup>H NMR (acetone-*d*<sub>6</sub>, δ)

0.22 (s, 3H), 0.25 (s, 3H), 0.96 (s, 9H), 2.16–2.23 (m, 2H), 2.63 (t, 2H, *J* = 7.9 Hz), 3.32 (s, 3H), 3.43 (s, 3H), 3.50 (s, 3H), 3.97 (d, 1H, *J* = 5.8 Hz), 5.67 (d, 1H, *J* = 5.8 Hz), 6.36 (t, 1H, *J* = 4.8 Hz), 7.10–7.30 (m, 6H), 7.58–7.65 (m, 3H);

<sup>13</sup>C NMR (acetone-*d*<sub>6</sub>, δ)

–2.5, –2.4, 19.2, 23.8, 26.6, 28.5, 51.9, 52.7, 53.2, 68.4, 108.2, 109.6, 124.6, 127.0, 127.6, 128.2, 128.7, 128.9, 129.5, 129.7, 134.0, 134.3, 137.4, 137.6, 145.6, 150.2;

IR (neat)

3594, 2933, 2855, 2833, 1491, 1462, 1387, 1360, 1248, 1210, 1171, 1080, 1034, 990, 923, 890, 835, 806, 778, 746, 732 cm<sup>–1</sup>;

Anal. Calcd for C<sub>30</sub>H<sub>40</sub>O<sub>5</sub>Si: C, 70.83; H, 7.93. Found: C, 70.69; H, 7.78.

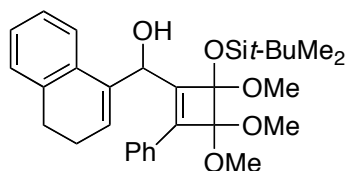

alcohol **iv** (more polar)

<sup>1</sup>H NMR (acetone-*d*<sub>6</sub>, δ)

0.14 (s, 3H), 0.21 (s, 3H), 0.91 (s, 9H), 2.08–2.23 (m, 2H), 2.50–2.63 (m, 2H), 3.34 (s, 3H), 3.41 (s, 3H), 3.61 (s, 3H), 4.31 (d, 1H, *J* = 5.3 Hz), 5.57 (d, 1H, *J* = 4.0 Hz), 6.30 (t, 1H, *J* = 4.6 Hz), 7.04–7.13 (m, 3H), 7.20–7.27 (m, 3H), 7.52 (d, 1H, *J* = 7.2 Hz), 7.65–7.69 (m, 2H);

<sup>13</sup>C NMR (acetone-*d*<sub>6</sub>, δ)

–2.6, –2.5, 19.0, 23.7, 26.6, 28.4, 51.9, 52.7, 53.4, 66.7, 108.1, 109.8, 124.4, 126.8, 127.4, 128.1, 128.2, 128.4, 128.9, 130.0, 133.7, 134.4, 136.7, 137.4, 147.4, 149.2;

IR (neat)

3460, 2936, 2884, 2855, 1490, 1470, 1449, 1388, 1359, 1248, 1209, 1174, 1083, 1001, 935, 887, 838, 779, 735 cm<sup>–1</sup>;

Anal. Calcd for C<sub>30</sub>H<sub>40</sub>O<sub>5</sub>Si: C, 70.83; H, 7.93. Found: C, 70.78; H, 7.99.

2) Vinyl lithium **A** was generated by halogen–lithium exchange of iodoalkene **a**,<sup>i)</sup> prepared from 1-tetralone.

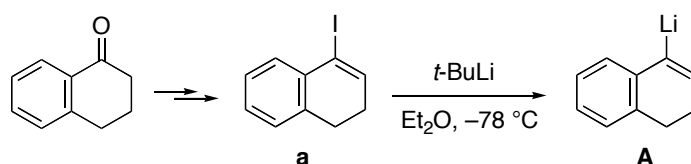

i) Lee, K.; Wiemer, D. F. *Tetrahedron Lett.* **1993**, *34*, 2433–2436.

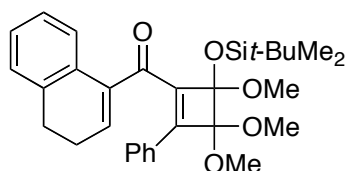

dienone **24**

$^1\text{H}$  NMR (acetone- $d_6$ ,  $\delta$ )

0.11 (s, 3H), 0.22 (s, 3H), 0.93 (s, 9H), 2.22–2.27 (m, 2H), 2.62 (t, 2H,  $J = 7.9$  Hz), 3.43 (s, 3H), 3.46 (s, 3H), 3.58 (s, 3H), 7.12 (t, 1H,  $J = 4.9$  Hz), 7.15–7.32 (m, 6H), 7.47–7.50 (m, 2H), 7.89–7.91 (m, 1H);

$^{13}\text{C}$  NMR (acetone- $d_6$ ,  $\delta$ )

–3.8, –3.6, 18.2, 23.6, 25.7, 26.6, 51.5, 51.6, 53.0, 107.8, 108.5, 126.0, 126.2, 127.6, 127.8, 128.3, 128.4, 129.4, 130.5, 132.0, 136.5, 137.6, 145.0, 145.4, 150.0, 192.1;

IR (neat)

2938, 2855, 2834, 1646, 1597, 1573, 1491, 1423, 1388, 1248, 1210, 1171, 1088, 1021, 1000, 938, 891, 836, 812, 780, 735  $\text{cm}^{-1}$ ;

Anal. Calcd for  $\text{C}_{30}\text{H}_{38}\text{O}_5\text{Si}$ : C, 71.11; H, 7.56. Found: C, 71.29; H, 7.76.

*Domino pericyclic reaction of dienones to salicylic acid derivatives;*

*Synthesis of benzene 9 starting from dienone 6 (Method A):*

A solution of dienone **6** (48.0 mg, 0.118 mmol) in mesitylene (3.0 mL) and 2,6-lutidine (0.5 mL) was heated at 165 °C for 10 h. After evaporation of the solvent, the residue was purified by PTLC (hexane/EtOAc = 9/1) to give **9** (35.4 mg, 80.1%) as a colorless oil.

*Synthesis of benzene 9 by reaction of enynone 5 and KSA 2a (Method B):*

A mixture of ynone **5** (37.0 mg, 0.237 mmol) and KSA **2a** (70.2 mg, 0.283 mmol) was heated at 60 °C for 1 h. After diluted in mesitylene (2.4 mL), the mixture was heated at 165 °C for 14 h. The crude product was purified by PTLC (hexane/ $\text{CH}_2\text{Cl}_2$ /Et $_2\text{O}$  = 6/2/2) to give **9** (66.4 mg, 75.2%) as a colorless oil.

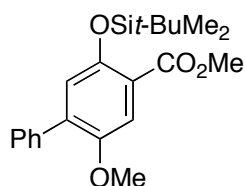

benzene **9**

$^1\text{H}$  NMR (acetone- $d_6$ ,  $\delta$ )

0.21 (s, 6H), 1.01 (s, 9H), 3.79 (s, 3H), 3.84 (s, 3H), 6.90 (s, 1H), 7.34–7.44 (m, 4H), 7.51–7.53 (m, 2H);

$^{13}\text{C}$  NMR (acetone- $d_6$ ,  $\delta$ )

–4.2, 18.8, 26.0, 52.0, 56.3, 114.4, 122.6, 124.3, 128.3, 128.8, 130.1, 136.3, 138.1, 149.6, 151.4, 166.9;

IR (neat)

3055, 3026, 2951, 2931, 2896, 2857, 1733, 1613, 1558, 1508, 1484, 1464, 1433, 1393, 1323, 1259, 1211, 1183, 1086, 1044, 1031, 989, 946, 894, 882, 840, 825, 811, 782, 744  $\text{cm}^{-1}$ ;

Anal. Calcd for  $\text{C}_{21}\text{H}_{28}\text{O}_4\text{Si}$ : C, 67.71; H, 7.58. Found: C, 67.80; H, 7.67.

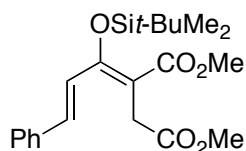

ester **7**

$^1\text{H}$  NMR (acetone- $d_6$ ,  $\delta$ )

0.20 (s, 3H), 1.06 (s, 9H), 3.48 (s, 2H), 3.62 (s, 3H), 3.68 (s, 3H), 7.07 (d, 1H,  $J = 16.2$  Hz), 7.28–7.44 (m, 3H), 7.51–7.63 (m, 2H), 8.11 (d, 1H,  $J = 16.2$  Hz);

$^{13}\text{C}$  NMR (acetone- $d_6$ ,  $\delta$ )

–3.2, 19.1, 26.3, 33.7, 51.7, 51.9, 110.9, 124.4, 128.1, 129.72, 129.77, 136.3, 137.0, 160.5, 168.3, 172.1;

IR (neat)

3025, 2952, 2932, 2887, 2859, 1743, 1710, 1626, 1581, 1569, 1463, 1434, 1312, 1285, 1259, 1191, 1169, 1116, 1055, 975, 933, 841, 828, 810, 784, 756  $\text{cm}^{-1}$ ;

Anal. Calcd for  $\text{C}_{21}\text{H}_{30}\text{O}_5\text{Si}$ : C, 64.58; H, 7.74. Found: C, 64.79; H, 7.95.

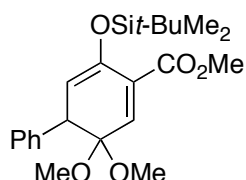

cyclohexadiene **8**

$^1\text{H}$  NMR (acetone- $d_6$ ,  $\delta$ )

0.12 (s, 6H), 0.90 (s, 9H), 3.09 (s, 3H), 3.25 (s, 3H), 3.77 (s, 3H), 3.81 (d, 1H,  $J = 6.6$  Hz), 5.28 (d, 1H,  $J = 6.6$  Hz), 6.24 (s, 1H), 7.16–7.42 (m, 3H), 7.30–7.36 (m, 2H);

$^{13}\text{C}$  NMR (acetone- $d_6$ ,  $\delta$ )

–4.6, –4.5, 18.6, 26.0, 49.3, 49.52, 49.54, 52.3, 100.5, 112.6, 127.7, 128.9, 129.6, 134.9, 135.5, 139.1, 144.5, 166.5;

IR (neat)

2952, 2858, 1737, 1482, 1379, 1256, 1123, 1076, 1053, 893, 840, 781  $\text{cm}^{-1}$ ;

Anal. Calcd for  $\text{C}_{22}\text{H}_{32}\text{O}_5\text{Si}$ : C, 65.31; H, 7.97. Found: C, 65.52; H, 8.18.

### Synthesis of benzene **13**:

According to the general procedure of **9** (Method B), ynone **10** (37.5 mg, 0.346 mmol) and KSA **2a** (131 mg, 0.527 mmol), after purification by PTLC (hexane/EtOAc = 8/2), gave **13** (79.8 mg, 70.9%) as a colorless oil.

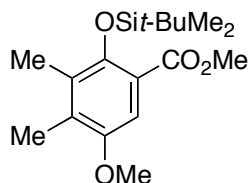

benzene **13**

$^1\text{H}$  NMR ( $\text{CDCl}_3$ ,  $\delta$ )

0.01 (s, 6H), 1.05 (s, 9H), 2.14 (s, 3H), 2.15 (s, 3H), 3.80 (s, 3H), 3.85 (s, 3H), 7.05 (s, 1H);

$^{13}\text{C}$  NMR ( $\text{CDCl}_3$ ,  $\delta$ )

–4.4, 12.7, 14.0, 18.3, 25.8, 51.8, 55.7, 109.3, 120.3, 130.8, 131.6, 146.3, 151.6, 168.3;

IR (neat)

2950, 2858, 1729, 1601, 1578, 1432, 1409, 1361, 1335, 1266, 1227, 1195, 1173, 1114, 1093, 1010, 963, 882, 841, 827, 814, 778, 731  $\text{cm}^{-1}$ ;

Anal. Calcd for  $\text{C}_{17}\text{H}_{28}\text{O}_4\text{Si}$ : C, 62.92; H, 8.70. Found: C, 63.13; H, 8.66.

#### Synthesis of benzene **14**:

According to the general procedure of **9** (Method B), ynone **11** (38.4 mg, 0.282 mmol) and KSA **2a** (106 mg, 0.426 mmol), after purification by PTLC (hexane/EtOAc = 8/2), gave **14** (65.4 mg, 66.1%) as a colorless oil.

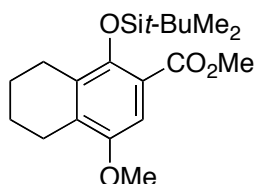

#### benzene **14**

$^1\text{H}$  NMR ( $\text{CDCl}_3$ ,  $\delta$ )

0.05 (s, 6H), 1.03 (s, 9H), 1.64–1.77 (m, 4H), 2.57–2.70 (m, 4H), 3.79 (s, 3H), 3.84 (s, 3H), 6.97 (s, 1H);

$^{13}\text{C}$  NMR ( $\text{CDCl}_3$ ,  $\delta$ )

–4.0, 18.4, 22.0, 22.3, 23.7, 25.0, 25.8, 51.7, 55.4, 108.0, 119.5, 131.9, 132.3, 146.3, 151.4, 168.3;

IR (neat)

2932, 2857, 1730, 1601, 1577, 1463, 1448, 1432, 1411, 1332, 1271, 1250, 1224, 1188, 1162, 1103, 1083, 1063, 989, 960, 939, 895, 882, 841, 827, 813, 788, 778, 728  $\text{cm}^{-1}$ ;

Anal. Calcd for  $\text{C}_{19}\text{H}_{30}\text{O}_4\text{Si}$ : C, 65.10; H, 8.63. Found: C, 65.23; H, 8.90.

#### Synthesis of cyclohexadiene **15**:

A mixture of dienone **5** (48.0 mg, 0.307 mmol) and KSA **2b** (98.7 mg, 0.452 mmol) was heated at 60 °C for 1 h. After diluted in xylene (3.0 mL), the reaction was heated at 140 °C for 3 h. Evaporation of the solvents gave the crude product, which was purified by PTLC (hexane/ $\text{CH}_2\text{Cl}_2$ / $\text{Et}_2\text{O}$  = 70/15/15) to give **15-cis** (84.7 mg, 73.6%) and **15-trans** (14.1 mg, 12.2%).

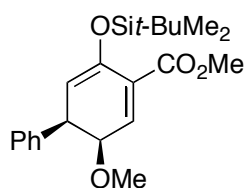

#### cyclohexadiene **15-cis** (colorless oil)

$^1\text{H}$  NMR (acetone- $d_6$ ,  $\delta$ )

0.19 (s, 3H), 0.20 (s, 3H), 0.93 (s, 9H), 3.25 (s, 3H), 3.73 (s, 3H), 3.84 (dd, 1H,  $J_1 = 5.4$ ,  $J_2 = 7.8$  Hz), 4.28 (dd, 1H,  $J_1 = 3.4$ ,  $J_2 = 7.8$  Hz), 5.24 (d, 1H,  $J = 5.4$  Hz), 6.45 (d, 1H,  $J = 3.4$  Hz) 7.15–7.35 (m, 5H);

$^{13}\text{C}$  NMR (acetone- $d_6$ ,  $\delta$ )

–5.3, 17.8, 25.1, 43.1, 51.2, 56.5, 77.5, 107.9, 126.6, 127.8, 129.4, 131.4, 136.1, 138.1, 146.5, 165.5;

IR (neat)

2962, 2903, 2858, 1734, 1647, 1599, 1261, 1091, 1019, 799  $\text{cm}^{-1}$

Anal. Calcd for  $\text{C}_{21}\text{H}_{30}\text{O}_3\text{Si}$ : C, 67.34; H, 8.07. Found: C, 67.55; H, 8.28.



#1 The stereochemistry of **15-cis** was determined on the basis of the observed NOE shown below.

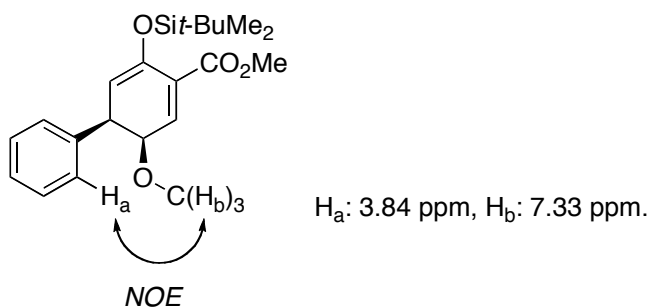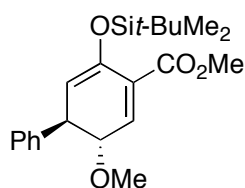

cyclohexadiene **15-trans**

$^1\text{H}$  NMR (acetone- $d_6$ ,  $\delta$ )

0.218 (s, 3H), 0.223 (s, 3H), 1.00 (s, 9H), 2.55 (dd, 1H,  $J = 5.6, 18.3$  Hz), 3.27 (s, 3H), 3.28 (dd, 1H,  $J = 2.2, 18.3$  Hz), 3.69 (s, 3H), 4.38 (dd, 1H,  $J = 2.2, 5.6$  Hz), 6.39 (s, 1H), 7.31–7.42 (m, 3H), 7.58–7.65 (m, 2H);

$^{13}\text{C}$  NMR (acetone- $d_6$ ,  $\delta$ )

–3.9, –3.8, 18.9, 26.1, 28.9, 51.1, 55.5, 73.0, 105.0, 125.8, 126.8, 129.3, 129.6, 139.2, 144.0, 155.6, 167.5;

IR (neat)

2930, 2858, 1713, 1637, 1580, 1435, 1372, 1297, 1251, 1209, 1165, 1087, 1075, 994, 946, 919, 884, 833, 782  $\text{cm}^{-1}$ ;

Anal. Calcd for  $\text{C}_{21}\text{H}_{30}\text{O}_3\text{Si}$ : C, 67.34; H, 8.07. Found: C, 67.45; H, 8.31.

#2 The stereochemistry of **15-trans** was determined on the basis of the observed NOE shown below.

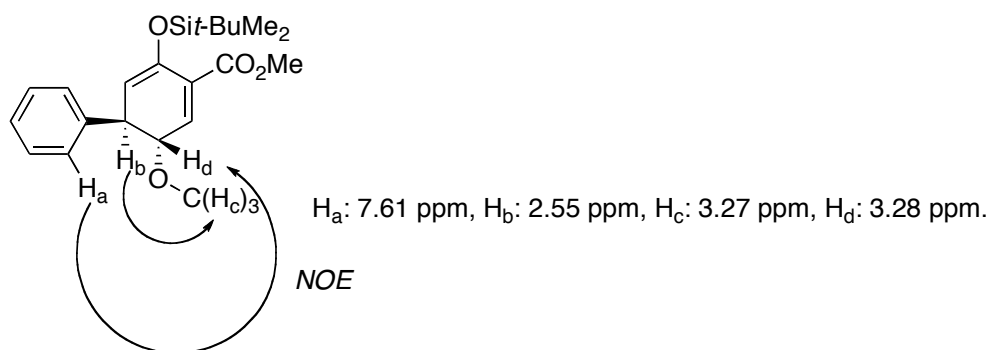

*Synthesis of cyclohexadiene 16:*

According to the general procedure of **15**, ynone **5** (32.3 mg, 0.235 mmol) and KSA **2c** (63.2 mg, 0.312 mmol), after purification by PTLC (hexane/EtOAc = 8/2), gave **16** (46.1 mg, 62.2%) as a colorless oil.

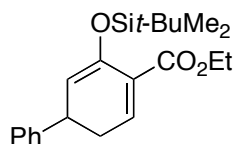

cyclohexadiene **16**

$^1\text{H}$  NMR (acetone- $d_6$ ,  $\delta$ )

0.196 (s, 3H), 0.199 (s, 3H), 0.94 (s, 9H), 1.26 (t, 3H,  $J = 7.0$  Hz), 2.35 (ddd, 1H,  $J_1 = 4.6$ ,  $J_2 = 11.7$ ,  $J_3 = 17.3$  Hz), 2.57 (ddd, 1H,  $J_1 = 4.6$ ,  $J_2 = 8.0$ ,  $J_3 = 17.3$  Hz), 3.69 (ddd, 1H,  $J_1 = 4.1$ ,  $J_2 = 8.0$ ,  $J_3 = 11.7$  Hz), 4.16 (q, 2H,  $J = 7.0$  Hz), 5.07 (d, 1H,  $J = 4.1$  Hz), 6.56 (t, 1H,  $J = 4.6$  Hz), 7.18–7.35 (m, 5H);

$^{13}\text{C}$  NMR (acetone- $d_6$ ,  $\delta$ )

–4.5, –4.4, 14.5, 18.7, 26.0, 32.9, 40.2, 60.9, 108.9, 127.3, 128.2, 129.3, 132.7, 135.8, 145.6, 147.6, 165.9;

IR (neat)

2955, 2931, 2896, 2858, 1729, 1643, 1601, 1472, 1382, 1363, 1276, 1251, 1214, 1073, 932, 840, 780, 756, 700  $\text{cm}^{-1}$ ;

Anal. Calcd for  $\text{C}_{21}\text{H}_{30}\text{O}_3\text{Si}$ : C, 70.35; H, 8.43. Found: C, 70.25; H, 8.41.

#### Synthesis of cyclohexadiene **17**:

According to the general procedure of **15**, ynone **10** (34.7 mg, 0.321 mmol) and KSA **2b** (89.7 mg, 0.411 mmol), after purification by PTLC (hexane/ $\text{CH}_2\text{Cl}_2/\text{Et}_2\text{O} = 70/15/15$ ), gave **17** (58.8 mg, 56.1%) as a colorless oil.

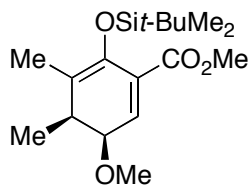

cyclohexadiene **17**

$^1\text{H}$  NMR (acetone- $d_6$ ,  $\delta$ )

–0.03 (s, 3H), 0.06 (s, 3H), 0.83 (d, 3H,  $J = 7.0$  Hz), 0.93 (s, 9H), 1.72 (s, 3H), 2.38 (dq, 1H,  $J_1 = 1.7$ ,  $J_2 = 7.0$  Hz), 3.34 (s, 3H), 3.68 (s, 3H), 4.23 (dd, 1H,  $J_1 = 2.2$ ,  $J_2 = 7.0$  Hz), 6.30 (dd, 1H,  $J_1 = 1.7$ ,  $J_2 = 2.2$  Hz);

$^{13}\text{C}$  NMR (acetone- $d_6$ ,  $\delta$ )

–4.5, –4.7, 8.3, 15.0, 18.5, 26.0, 37.8, 51.7, 56.5, 79.6, 121.5, 130.8, 137.3, 140.0, 166.3;

IR (neat)

2951, 2930, 2899, 2857, 1734, 1650, 1603, 1472, 1462, 1435, 1377, 1366, 1330, 1298, 1258, 1195, 1130, 1100, 1065, 1054, 1014, 981, 941, 890, 840, 785, 743  $\text{cm}^{-1}$ ;

Anal. Calcd for  $\text{C}_{17}\text{H}_{30}\text{O}_4\text{Si}$ : C, 62.54; H, 9.26. Found: C, 62.75; H, 9.46.

<sup>#3</sup>The stereochemistry of **17** was determined on the basis of the observed NOE shown below.

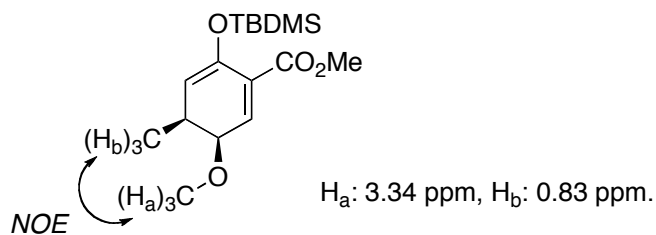

#### Synthesis of cyclohexadiene **18**:

According to the general procedure of **15**, ynone **11** (28.0 mg, 0.209 mmol) and KSA **2b** (112 mg, 0.513 mmol), after purification by PTLC (hexane/ $\text{CH}_2\text{Cl}_2$ / $\text{Et}_2\text{O}$  = 8/1/1), gave **18** (36.6 mg, 49.8%) as a colorless oil.

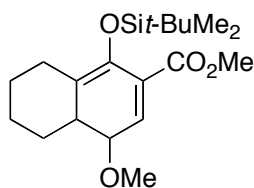

#### cyclohexadiene **18**

$^1\text{H}$  NMR (acetone- $d_6$ ,  $\delta$ )

0.02 (s, 3H), 0.03 (s, 3H), 0.94 (s, 9H), 1.14–1.52 (m, 3H), 1.71–1.85 (m, 4H), 2.37–2.44 (m, 1H), 2.79–2.84 (m, 1H), 3.31 (s, 3H), 3.69 (s, 3H), 3.93 (dd, 1H,  $J_1 = 4.1$ ,  $J_2 = 7.6$  Hz), 6.40 (d, 1H,  $J = 4.1$  Hz);

$^{13}\text{C}$  NMR (acetone- $d_6$ ,  $\delta$ )

–4.8, –4.6, 18.6, 25.95, 26.04, 26.1, 27.3, 27.8, 42.4, 51.8, 56.7, 75.3, 123.7, 132.0, 133.0, 137.6, 167.0;

IR (neat)

2930, 2858, 1735, 1646, 1588, 1472, 1462, 1435, 1362, 1254, 1204, 1098, 840, 780  $\text{cm}^{-1}$ ;

Anal. Calcd for  $\text{C}_{19}\text{H}_{32}\text{O}_4\text{Si}$ : C, 64.73; H, 9.15. Found: C, 64.43; H, 8.95.

#### Synthesis of cyclohexadiene **19**:

According to the general procedure of **15**, ynone **12** (36.6 mg, 0.338 mmol) and KSA **2b** (100 mg, 0.458 mmol), after purification by PTLC (hexane/ $\text{EtOAc}$  = 8/2), gave **19** (66.1 mg, 59.8%) as a colorless oil.

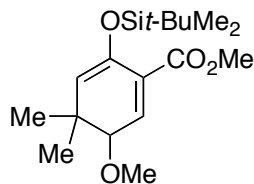

#### cyclohexadiene **19**

$^1\text{H}$  NMR ( $\text{CDCl}_3$ ,  $\delta$ )

0.10 (s, 3H), 0.13 (s, 3H), 0.89 (s, 9H), 0.94 (s, 3H), 1.08 (s, 3H), 3.40 (s, 3H), 3.73 (s, 3H), 3.74 (d, 1H,  $J = 2.6$  Hz), 4.79 (s, 1H), 6.59 (d, 1H,  $J = 2.6$  Hz);

$^{13}\text{C}$  NMR ( $\text{CDCl}_3$ ,  $\delta$ )

–4.8, –4.6, 18.0, 19.7, 25.6, 27.3, 37.4, 51.8, 57.7, 84.3, 117.3, 130.4, 137.8, 143.7, 166.1;

IR (neat)

2853, 2932, 2859, 1734, 1642, 1274, 1437, 1363, 1257, 1172, 1104, 1004, 951, 883, 840, 783  $\text{cm}^{-1}$ ;

Anal. Calcd for  $C_{17}H_{30}O_4Si$ : C, 62.54; H, 9.26. Found: C, 62.33; H, 9.43.

*Synthesis of benzene 23:*

According to the general procedure of **9** (Method A), dienone **22** (44.1 mg, 0.102 mmol), after purification by PTLC (hexane/EtOAc = 8/2), gave **23** (31.6 mg, 77.4%) as a colorless oil.

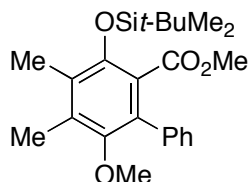

benzene **23**

$^1H$  NMR ( $CDCl_3$ ,  $\delta$ )

0.11 (s, 6H), 1.02 (s, 9H), 2.18 (s, 3H), 2.24 (s, 3H), 3.23 (s, 3H), 3.40 (s, 3H), 7.27–7.38 (m, 5H);

$^{13}C$  NMR ( $CDCl_3$ ,  $\delta$ )

–3.8, 13.3, 14.4, 18.4, 25.9, 51.5, 60.3, 124.8, 127.0, 127.7, 129.2, 129.4, 131.7, 133.4, 136.8, 145.9, 150.0, 167.9;

IR (neat)

2949, 2930, 2895, 2858, 1732, 1563, 1452, 1402, 1339, 1294, 1257, 1214, 1169, 1090, 1012, 970, 933, 900, 837, 828, 817, 782, 755  $cm^{-1}$ ;

Anal. Calcd for  $C_{23}H_{32}O_4Si$ : C, 68.96; H, 8.05. Found: C, 69.03; H, 8.01.

*Synthesis of benzene 25:*

According to the general procedure of **9** (Method A), dienone **24** (36.5 mg, 0.0720 mmol), after purification by PTLC (hexane/EtOAc = 8/2), gave **25** (24.0 mg, 70.2%) as a colorless oil.

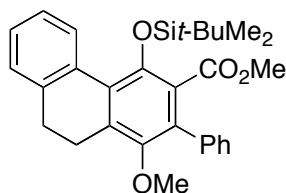

benzene **25**

$^1H$  NMR ( $CDCl_3$ ,  $\delta$ )

–0.3 (s, 6H), 0.93 (s, 9H), 2.75–2.86 (m, 4H), 3.26 (s, 3H), 3.45 (s, 3H), 7.19–7.39 (m, 8H), 8.15–8.18 (m, 1H);

$^{13}C$  NMR ( $CDCl_3$ ,  $\delta$ )

–4.4, 18.1, 23.1, 25.9, 28.9, 51.5, 60.5, 126.1, 127.2, 127.3, 127.4, 128.5, 128.9, 129.4, 133.1, 133.3, 135.6, 136.5, 138.3, 145.8, 148.9, 167.8;

IR (neat)

2948, 2930, 2857, 1733, 1544, 1499, 1472, 1461, 1444, 1361, 1319, 1303, 1275, 1210, 1176, 1125, 1063, 1032, 1019, 971, 881, 841, 781, 769  $cm^{-1}$ ;

Anal. Calcd for  $C_{29}H_{34}O_4Si$ : C, 73.38; H, 7.22. Found: C, 73.19; H, 7.32.

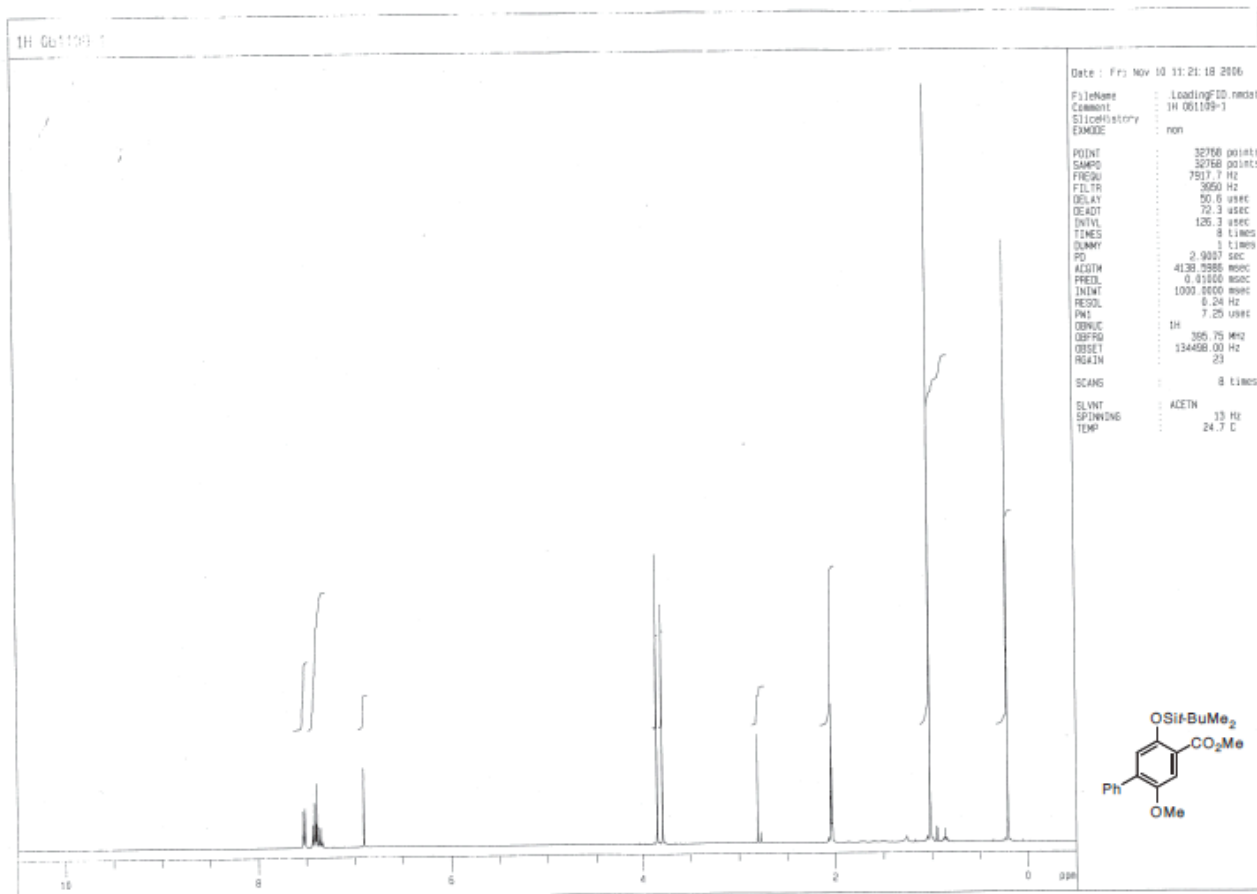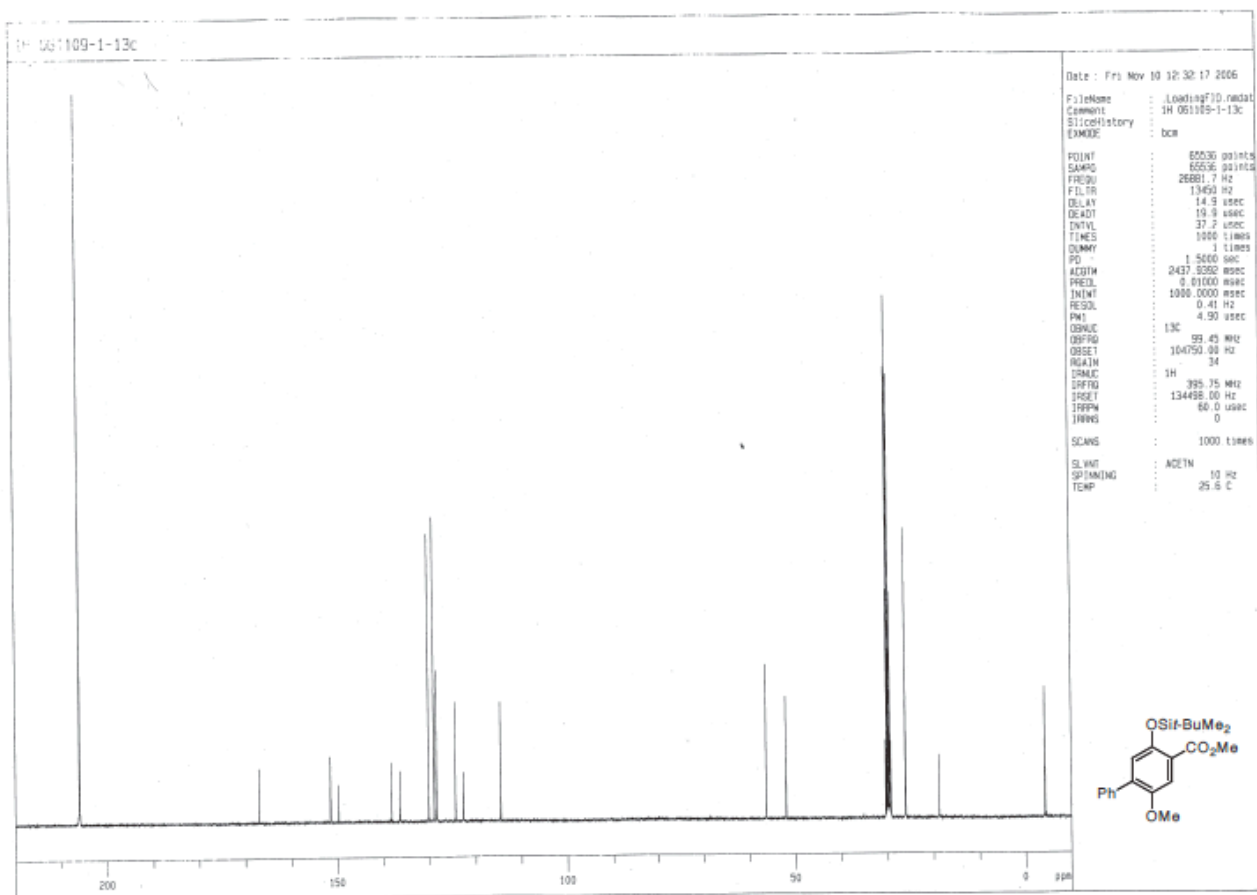

non

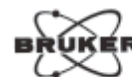

Current Data Parameters  
 NAME iwaca  
 EXPNO 45  
 PROCNO 1

F2 - Acquisition Parameters  
 Date\_ 2012119  
 Time 23.17  
 INSTRUM spect  
 PROBRD 5 mm Multinucl  
 PULPROG zgpg30  
 TD 32768  
 SFO1 327.63 MHz  
 SOLVENT CDCl3  
 NS 8  
 DS 2  
 SWH 7502.801 Hz  
 FIDRES 0.213709 Hz  
 AQ 2.337555 sec  
 RG 71.8  
 SW 71.480 use  
 DE 6.00 use  
 TE 300.0 K  
 D1 3.0000000 sec  
 DELTA 0.0000000 sec  
 ACQRES 0.9150000 sec

===== CHANNEL f1 =====  
 NUCL 13C  
 P1 4.50 use  
 PL1 -2.10 dB  
 SFO1 500.1330508 MHz

F2 - Processing parameters  
 SI 32768  
 SF 500.1330513 MHz  
 WDW EM  
 SSB 0  
 LA 0.20 Hz  
 GB 0  
 PC 1.03

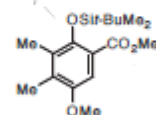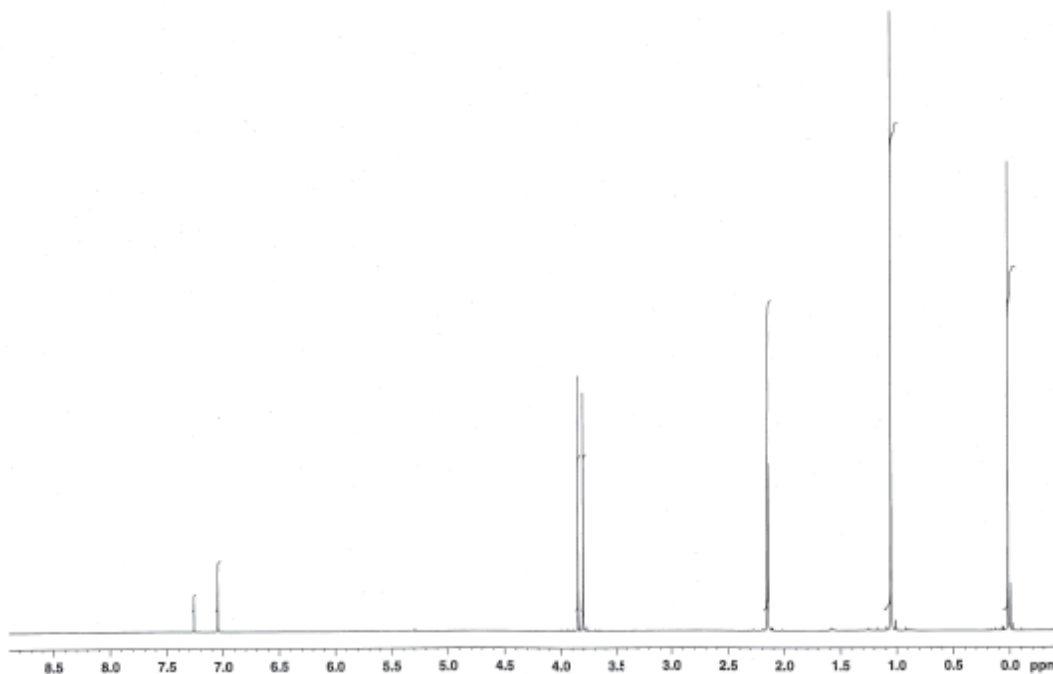

BCM

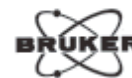

Current Data Parameters  
 NAME iwaca  
 EXPNO 45  
 PROCNO 1

F2 - Acquisition Parameters  
 Date\_ 2012119  
 Time 23.59  
 INSTRUM spect  
 PROBRD 5 mm Multinucl  
 PULPROG zgpg30  
 TD 65536  
 SFO1 650.1330508 MHz  
 SOLVENT CDCl3  
 NS 8  
 DS 2  
 SWH 26455.027 Hz  
 FIDRES 0.403672 Hz  
 AQ 1.2386393 sec  
 RG 2294.8  
 SW 26455.027 use  
 DE 6.00 use  
 TE 300.0 K  
 D1 2.0000000 sec  
 DELTA 0.0000000 sec  
 ACQRES 1.8999999 sec  
 DELTA 0.0000000 sec  
 ACQRES 0.9150000 sec

===== CHANNEL f1 =====  
 NUCL 13C  
 P1 4.30 use  
 PL1 3.00 dB  
 SFO1 125.7698860 MHz

===== CHANNEL f2 =====  
 CHOPRO2 waltz16  
 NUCL 1H  
 PCP02 30.00 use  
 PL2 120.00 dB  
 PL12 18.70 dB  
 PL13 18.70 dB  
 SFO2 500.1330505 MHz

F2 - Processing parameters  
 SI 65536  
 SF 125.7577810 MHz  
 WDW EM  
 SSB 0  
 LA 1.00 Hz  
 GB 0  
 PC 1.40

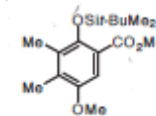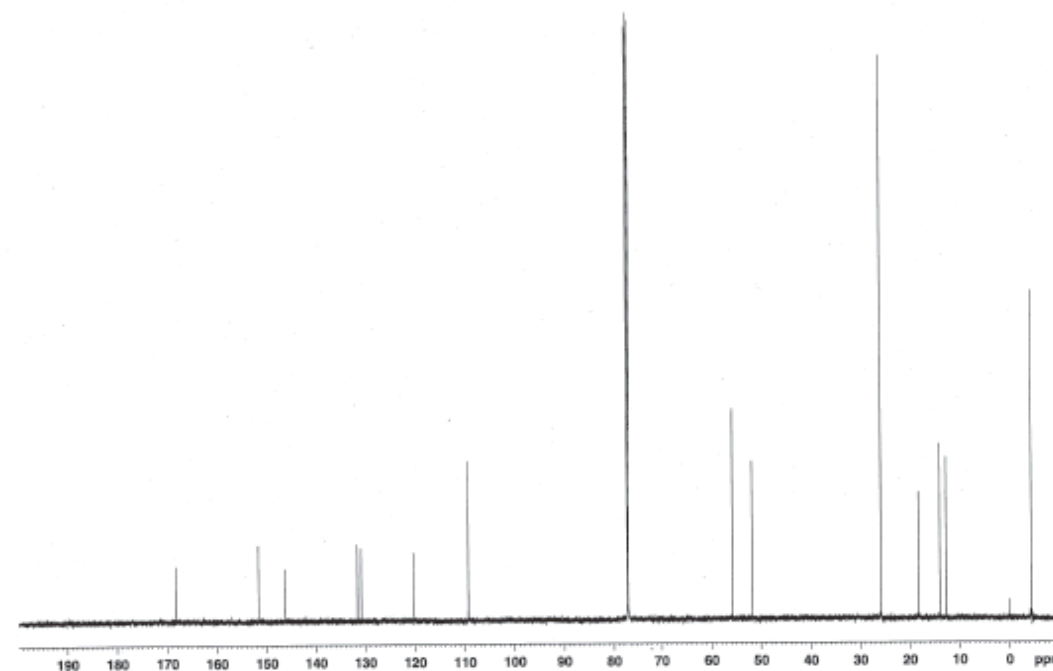

non

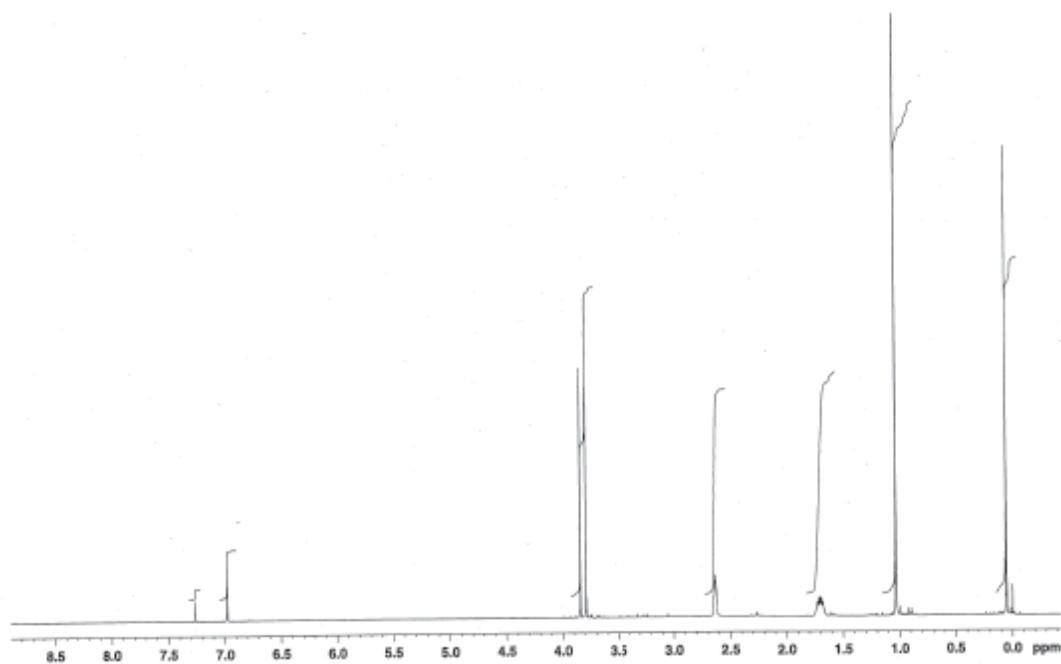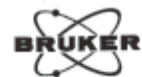

Current Data Parameters  
NAME iwata  
EXPNO 47  
PROCNO 1

F2 - Acquisition Parameters  
Date\_ 20061219  
Time 21.07  
INSTRUM spect  
PROBHD 5 mm Multisoc1  
PULPROG zg  
TD 32768  
SOLVENT CDCl3  
NS 8  
DS 2  
SWH 7002.861 Hz  
FIDRES 0.233769 Hz  
AQ 2.1397563 sec  
RG 50.8  
DM 71.402 use  
DE 6.00 use  
TE 300.0 K  
D1 2.0000000 sec  
MCRET 0.0000000 sec  
MCRGX 0.0100000 sec

\*\*\*\*\* CHANNEL f1 \*\*\*\*\*  
NUC1 1H  
P1 4.50 use  
PL1 -2.10 dB  
SFO1 500.1330129 MHz

F2 - Processing parameters  
SI 32768  
SF 500.1330122 MHz  
WDW EM  
SSB 0  
LA 0.20 Hz  
GB 0  
PC 1.40

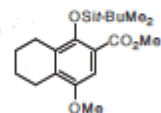

BCM

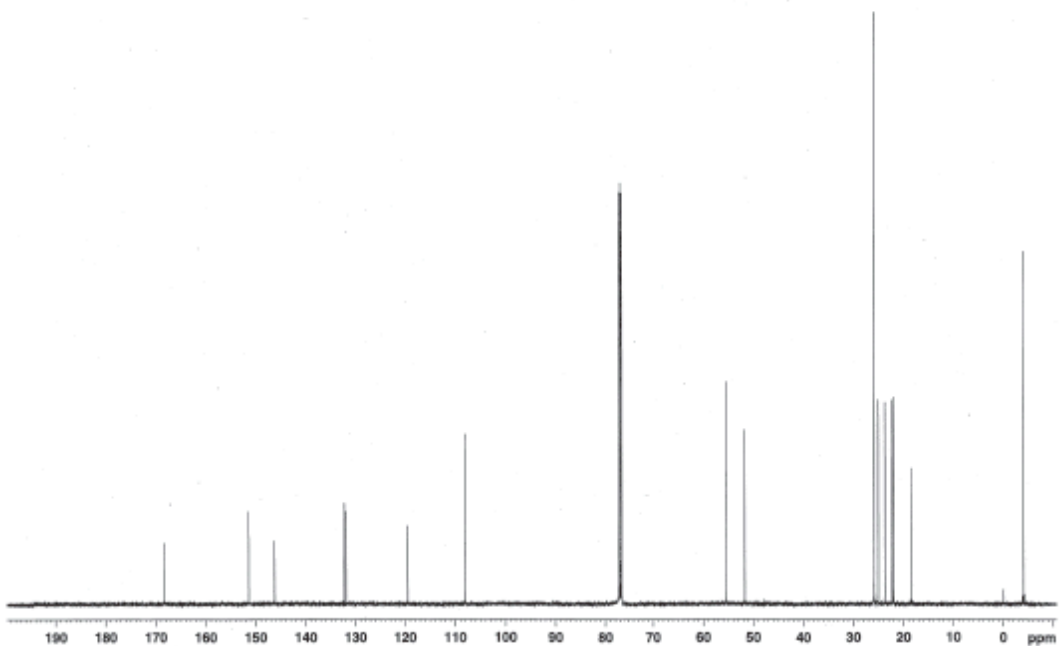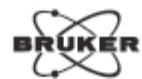

Current Data Parameters  
NAME iwata  
EXPNO 48  
PROCNO 1

F2 - Acquisition Parameters  
Date\_ 20061219  
Time 21.48  
INSTRUM spect  
PROBHD 5 mm Multisoc1  
PULPROG zgpg30  
TD 65536  
SOLVENT CDCl3  
NS 8  
DS 0  
SWH 26485.027 Hz  
FIDRES 0.402672 Hz  
AQ 1.2385933 sec  
RG 2048  
DM 10.900 use  
DE 6.00 use  
TE 300.0 K  
D1 2.0000000 sec  
d11 2.0000000 sec  
DELTA 1.8999999 sec  
MCRET 0.0000000 sec  
MCRGX 0.0100000 sec

\*\*\*\*\* CHANNEL f1 \*\*\*\*\*  
NUC1 13C  
P1 4.30 use  
PL1 3.00 dB  
SFO1 125.7696860 MHz

\*\*\*\*\* CHANNEL f2 \*\*\*\*\*  
CFPRG02 waltz16  
NUC2 1H  
PCW02 80.00 use  
PL2 120.00 dB  
PL12 18.70 dB  
PL13 18.70 dB  
SFO2 500.1326015 MHz

F2 - Processing parameters  
SI 65536  
SF 125.7577916 MHz  
WDW EM  
SSB 0  
LB 1.00 Hz  
GB 0  
PC 1.40

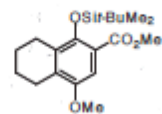

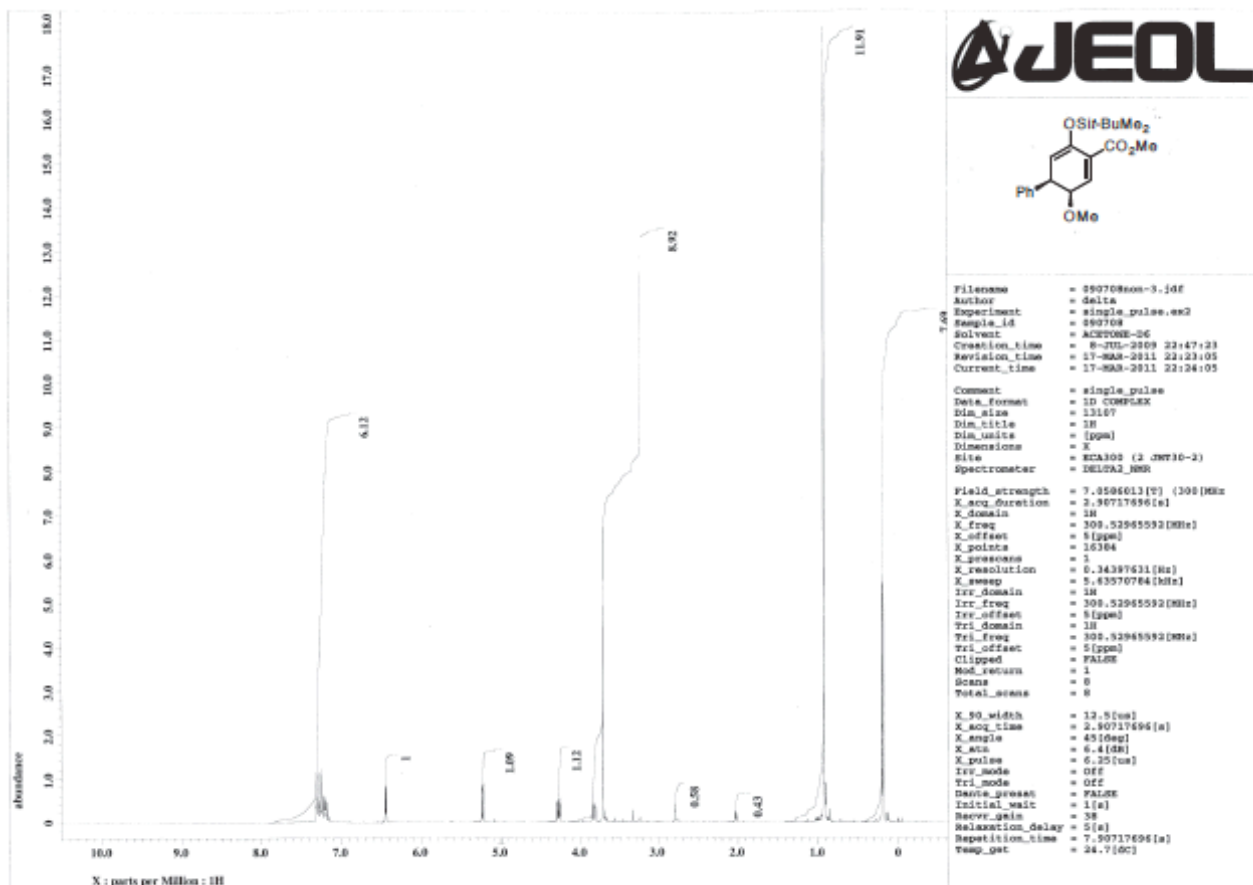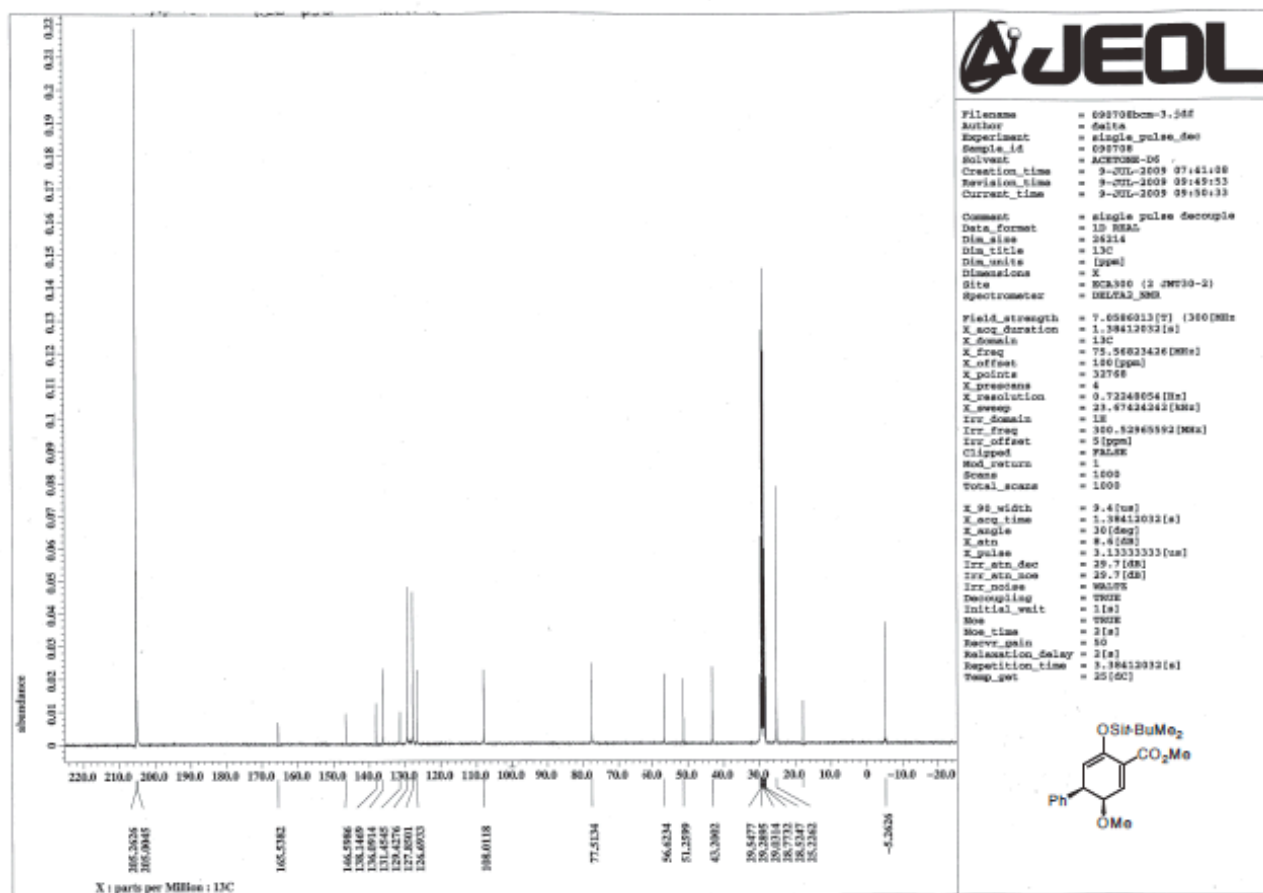



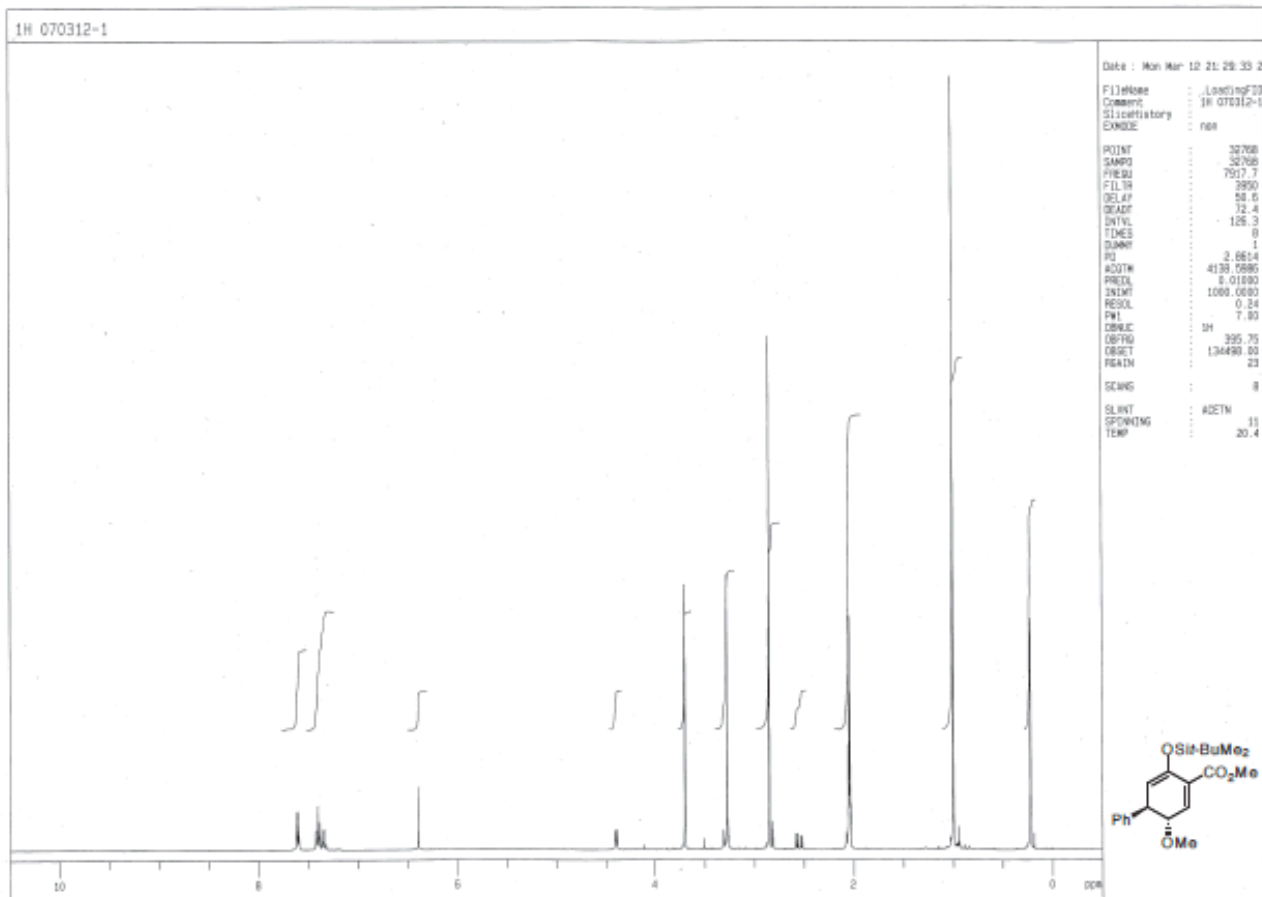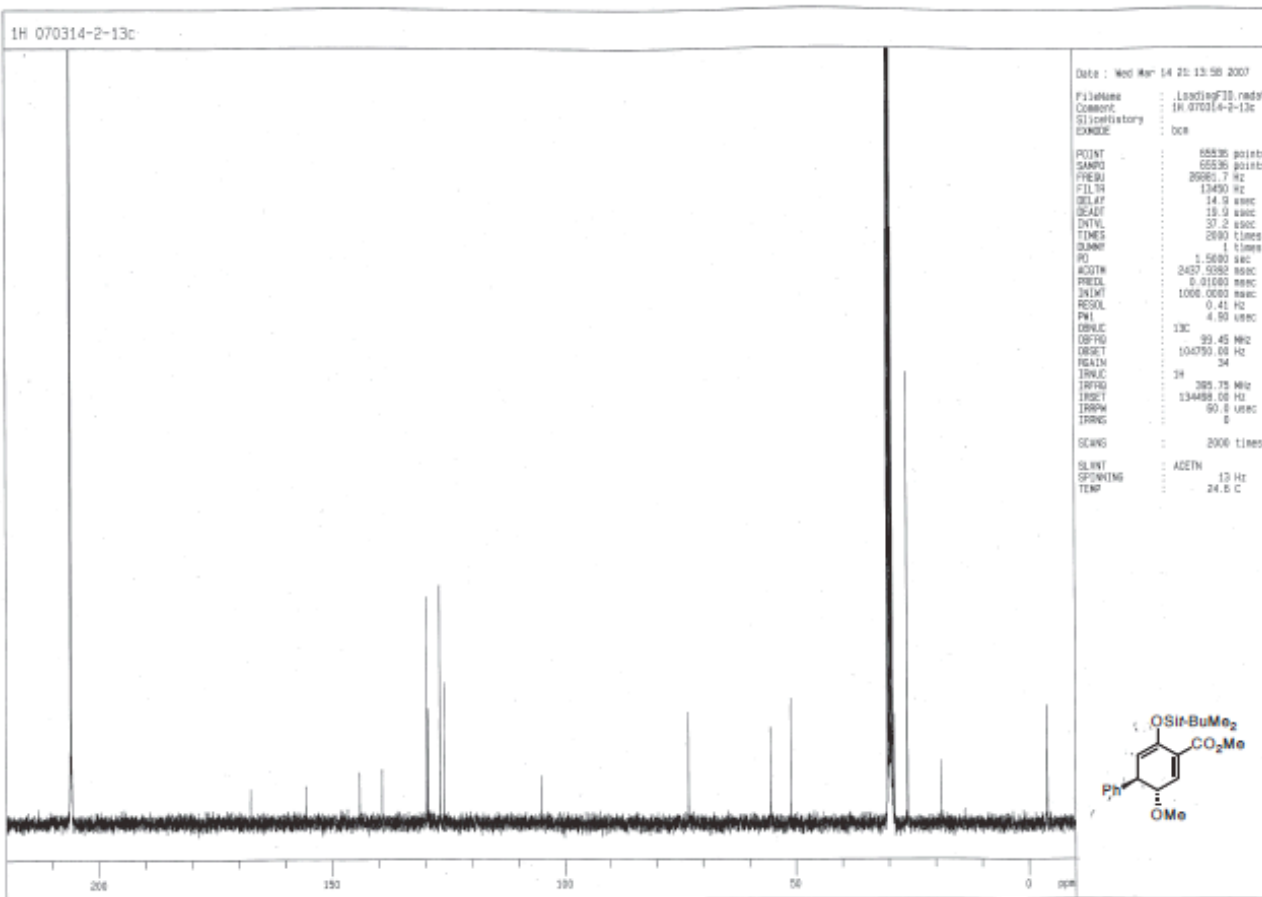

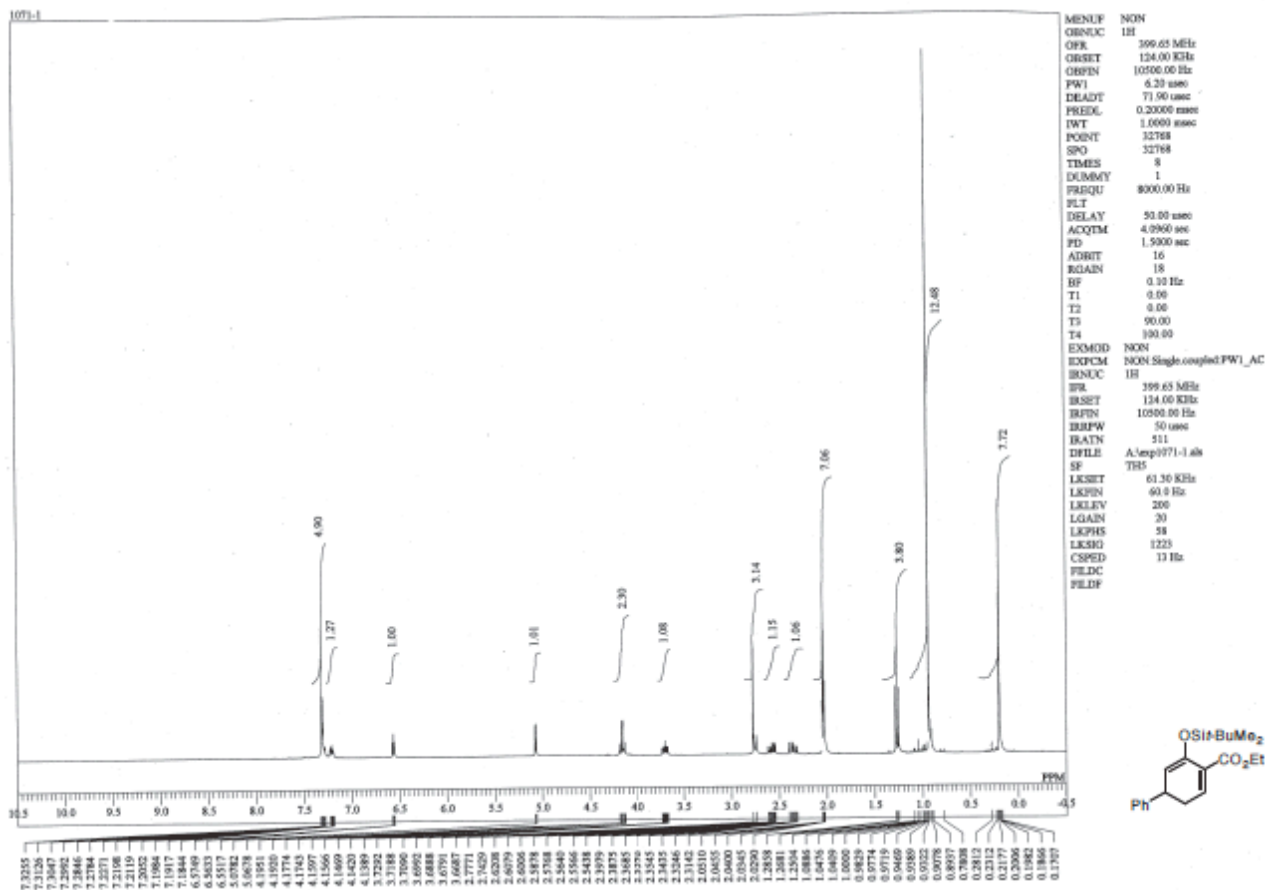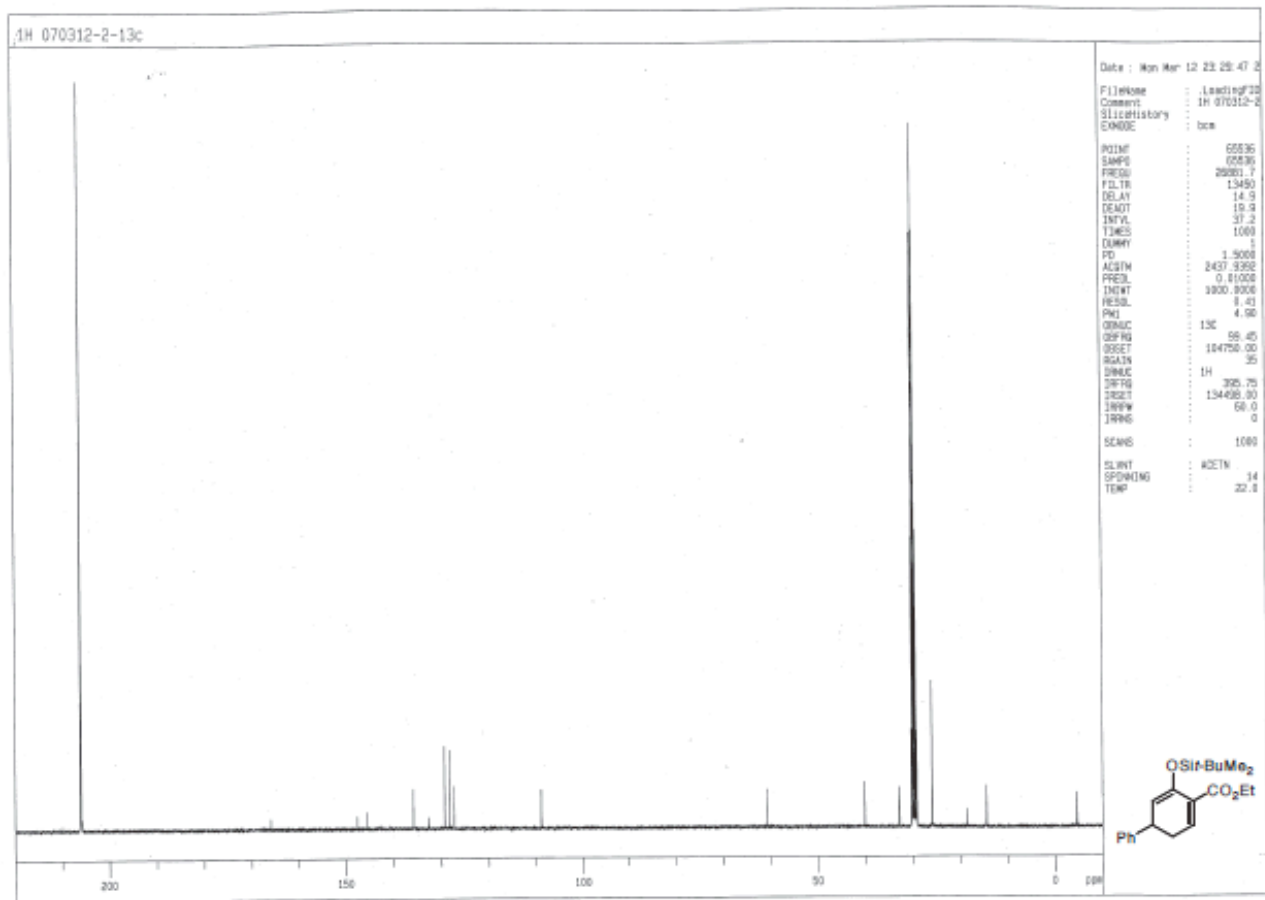

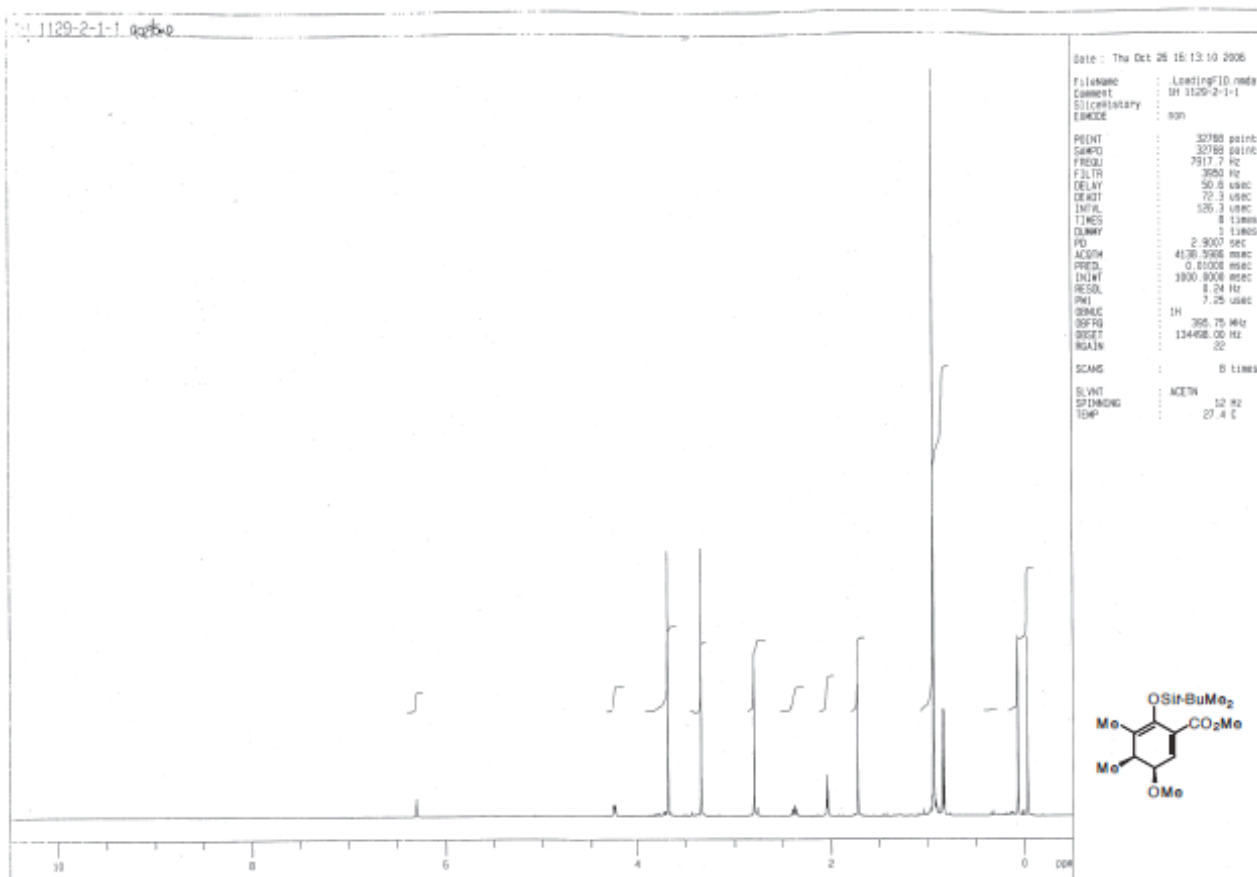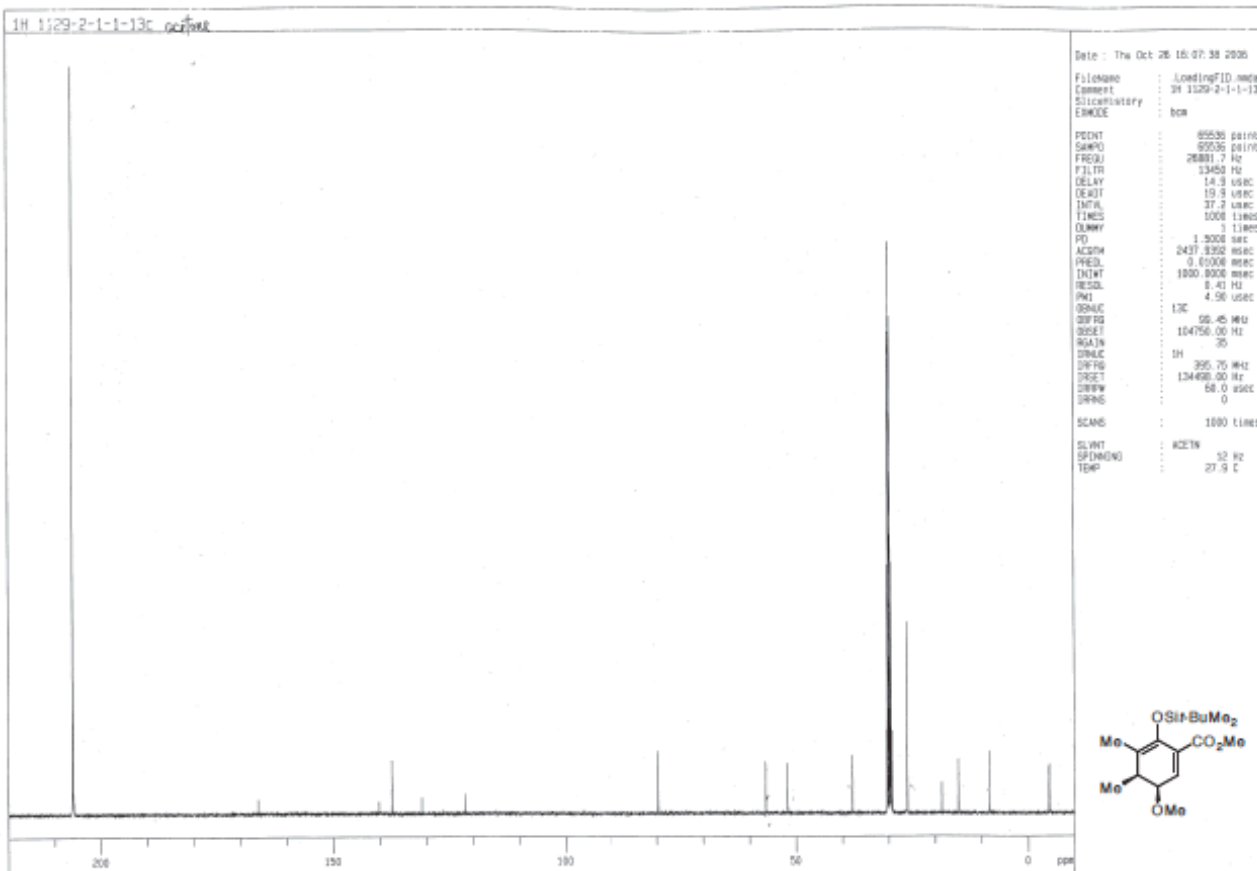

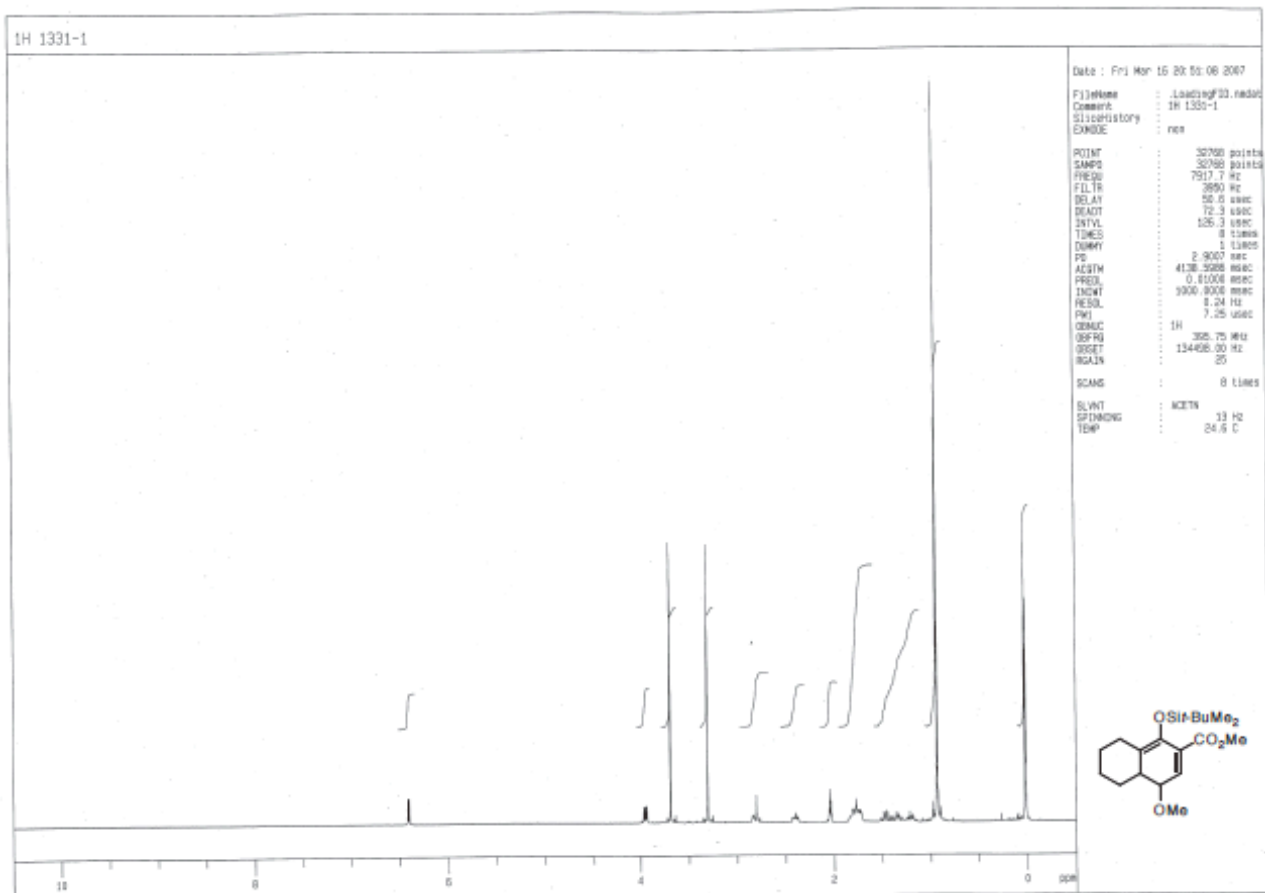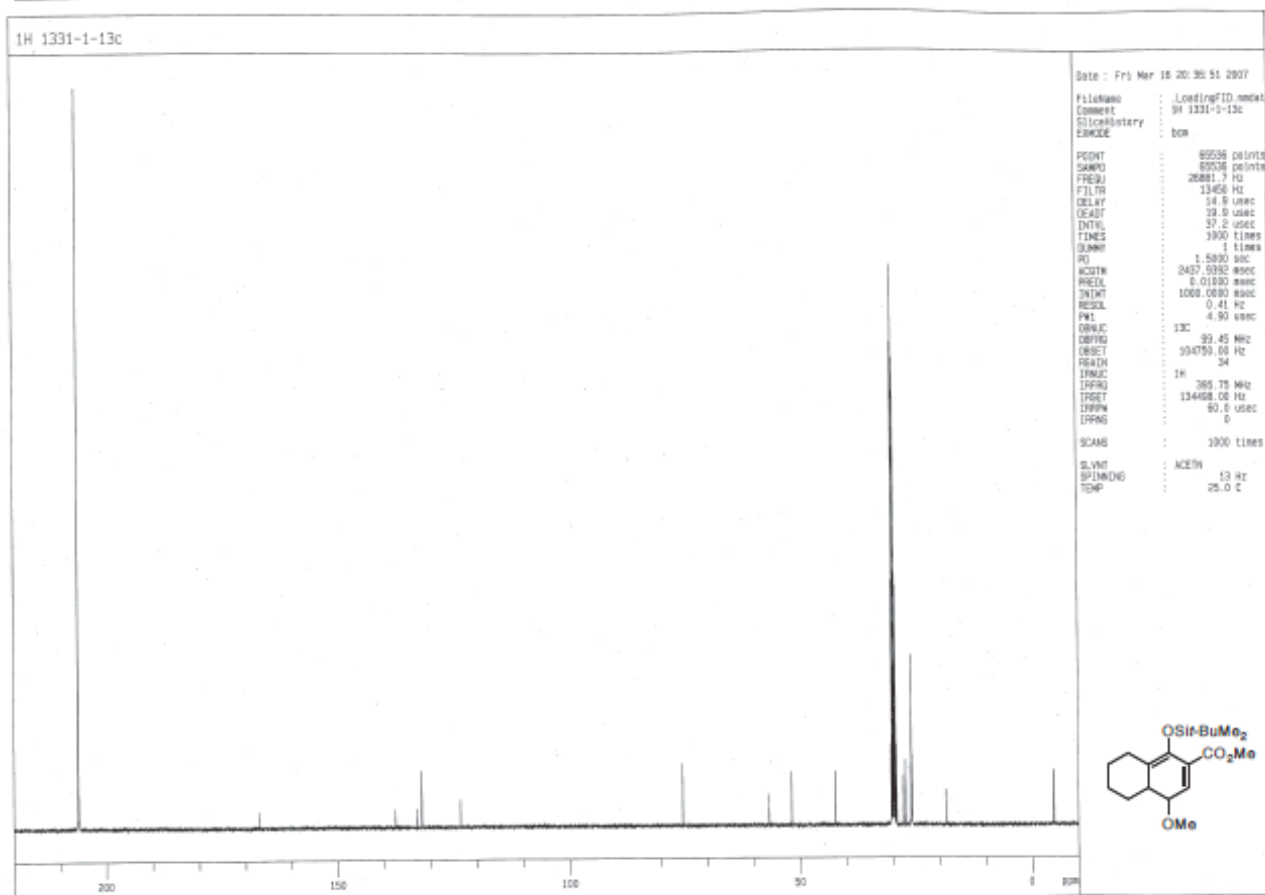

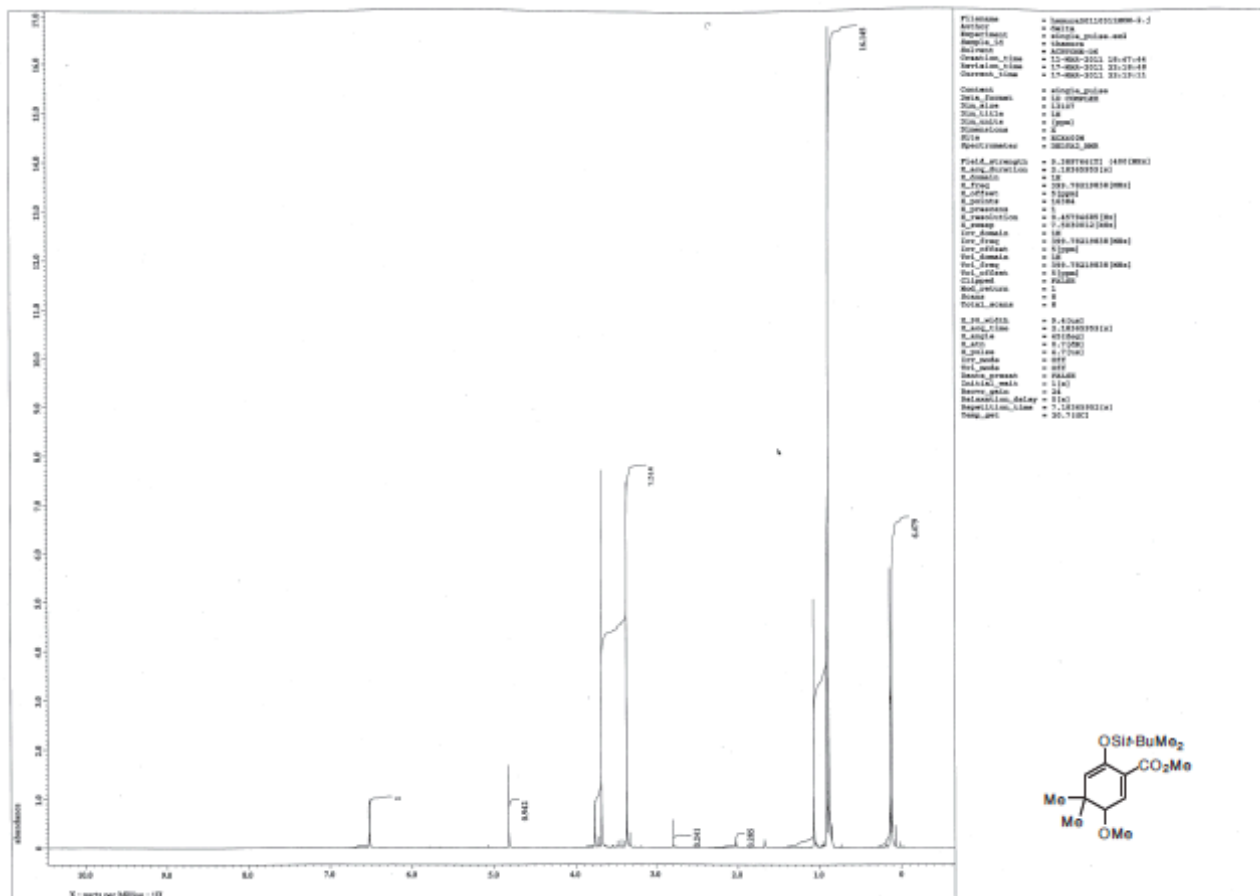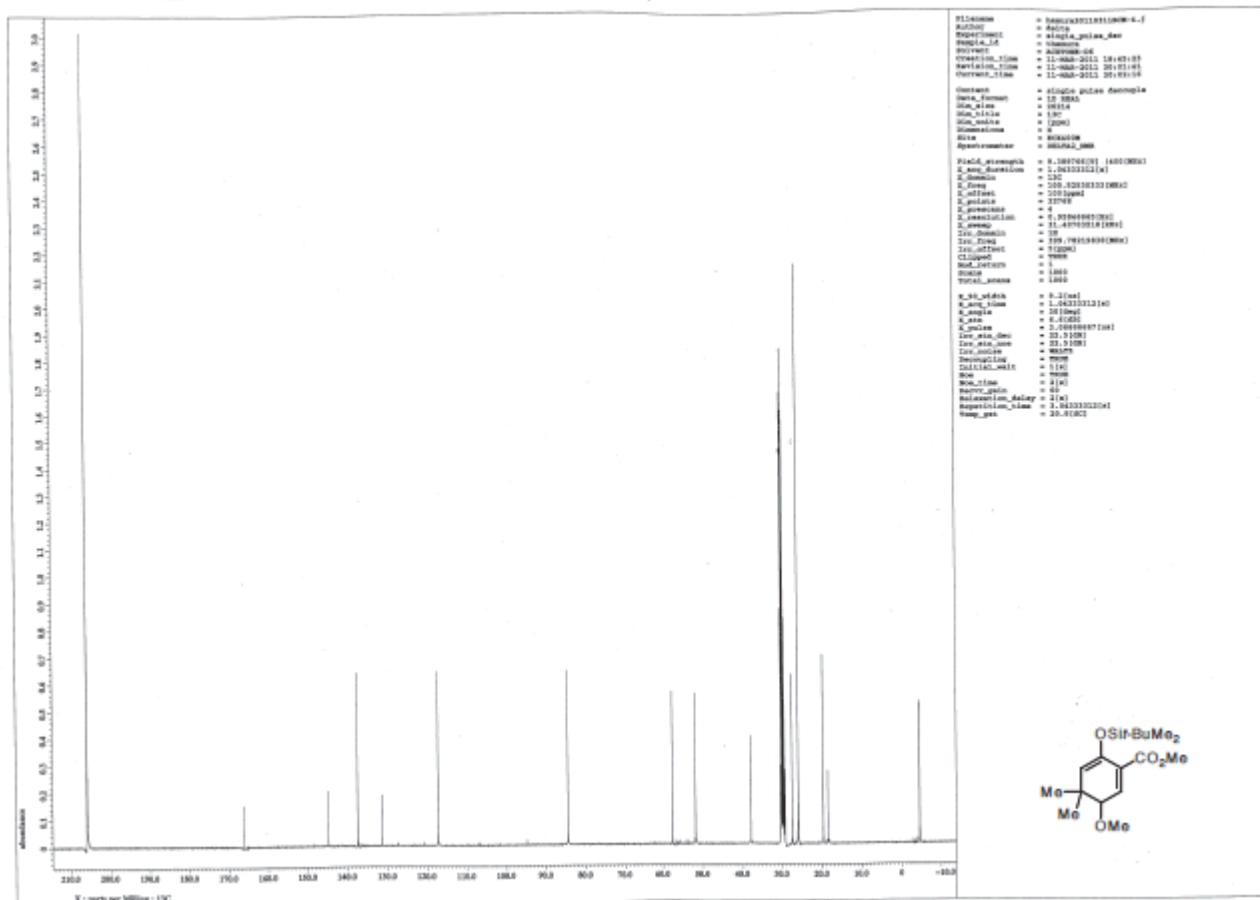

Supplement: c1cc11758k.pdf [file c1cc11758k.pdf]
